# Supplementary material for: Hybrid Sequencing Reveals Novel Features in the Transcriptomic Organization of Equid Alphaherpesvirus 1
Source: Preprints.org preprint supplement (doi:10.20944/preprints202206.0219.v1), 2022-06-15
Supplement: Supplementary file 1 [file Supplementary Table S1.xlsx]

## Sheet: ReadStat
Samples	Read count	Mapped read count	Mapped fraction	Min read length	Min mapped read length	Mean read length	Stdev length	Mean mapped read length	Stdev mapped length	Median read length	Median mapped read length	Max read length	Max mapped read length	Mismatch fraction	Stdev mismatch	Insertion fraction	Stdev insertion	Deletion fraction	Stdev deletion	GC fraction of aligned	Stdev GC content
EHV-1_dRNA_minion_20210128_p	449,468	5,3625	0.11930771489850223	3	97	719.7636806179751	428.6017018706114	722.1953193473194	399.85531137218163	606.0	629.0	7,137	6,732	0.047242357955246735	22.038504708087267	0.03887238506450831	23.821029319416873	0.060577533551932974	27.628212939081756	0.5449593681260484	218.6183787763689
EHV-1_dcDNA_barcode12_minion_20210129_p	527,919	94,934	0.17982682949467627	96	81	1,069.5039750416256	861.9492397605335	925.5133250468747	968.1048545987597	827.0	596.0	19,665	12,398	0.04221183459890287	44.88289379276188	0.032591709413104415	59.08129349452175	0.052349551542257726	55.970315575879056	0.5432469156814493	527.6363417453828
EHV-1_dRNA_terminator_minion_20210128_p	334,958	40,001	0.11942094232709773	3	124	812.0535052155793	452.7646990406053	826.7339066523336	458.91776898760435	695.0	723.0	7,788	5,589	0.051433129354016574	27.607063289562568	0.040673618286297356	27.100328677520487	0.06583791810284206	35.17651869400331	0.5499276493268876	240.97624035896322
EHV-1_dcDNA_flongle_p	212,209	38,904	0.1833286995367774	116	88	1,184.9378678566884	847.6841603416726	894.6546113510179	754.3127376917756	954.0	677.0	24,427	10,372	0.03743249334597841	32.37237925379714	0.03164992527217497	74.37248701886602	0.04835152736583548	42.28849172578642	0.535467280406226	413.3554108157705
EHV-1_dynamic_12h_barcode11_minion_FAN02013_20210218_p	715,399	200,984	0.2809397273409664	88	79	996.0797918364437	946.2142872973326	792.1535395852407	869.2076871655946	722.0	482.0	71,966	12,926	0.03938723468743869	38.58510152649132	0.04070891519020702	72.12226279761263	0.043102606242149566	42.72159767628384	0.551768951819647	484.33209904791323
EHV-1_dynamic_12h_barcode12_minion_FAN02013_20210218_p	801,017	233,851	0.29194261794693493	90	79	997.1798601028443	919.3328691212316	767.8334666090801	835.6233034434505	734.0	482.0	27,131	13284	0.03908947865405785	36.859436306286064	0.040529793768078776	70.71045085626622	0.04282913751889745	40.72425113910519	0.5506040912855291	465.1967607600717
EHV-1_dynamic_12h_barcode10_minion_FAN02013_20210218_p	993,386	293,485	0.2954390337693505	81	79	1,020.2448725872923	949.6464641054115	834.2149922483261	925.228972292175	744.0	482.0	30,656	14,153	0.039021758428240946	40.39682395460686	0.03868168923554162	67.85529449955612	0.04252329192549755	43.99964556547491	0.5487530884083875	511.72164884137374
EHV-1_dcDNA_terminator_barcode06_minion_20210129_p	1,817,784	319,379	0.17569689248007464	107	79	1,070.2883851986815	877.8605630241625	1,019.0448714536648	1,048.8855130979055	807.0	639.0	38,207	13,889	0.042176738724378646	49.04706877115593	0.033316284518687754	62.36041262917987	0.0521738618252433	60.42282416293291	0.5464389874499823	570.4787002567799
EHV-1_dynamic_1h_barcode14_minion_FAL91478_20210206_p	679,266	252	0.0003709886848451122	91	95	998.7669749405976	855.8329443541152	414.83730158730157	512.3000643118102	750.0	286.5	27,085	5,315	0.03712490075474225	24.05144882543812	0.03923894431743177	30.52688421021521	0.04325658366733946	24.7821763336789	0.5425630625890816	287.4395385408468
EHV-1_dynamic_18h_barcode20_minion_FAN02079_20210212_p	845,968	326,781	0.38628056853214304	85	79	773.5699719138313	631.5319410878838	557.1362594520489	538.9573086231565	618.0	403.0	25,145	9,388	0.039475244700769976	24.638443522084128	0.038483591021286734	53.721827637198245	0.043448236383187	27.786050703142745	0.5354031271974712	299.09095333689913
EHV-1_dynamic_18h_barcode19_minion_FAN02079_20210212_p	978,171	370,606	0.3788764950095638	93	79	799.5689076858749	652.902651859735	596.2199667571491	573.3960251116331	633.0	439.0	21,623	9,382	0.03950191194489267	26.22808351464826	0.039055646573683885	54.13759917313814	0.042978715995668715	28.957308657581834	0.5389052071535857	317.5665786673817
EHV-1_dynamic_1h_barcode15_minion_FAL91478_20210206_p	917,511	372	0.0004054447303629057	100	87	953.9977286375859	819.3418275179145	400.39247311827955	385.0675534913565	720.0	285.5	28,159	2,725	0.03526781518134089	15.191460614793314	0.04411665972902931	37.94729631128499	0.040766452271292955	19.00966489341818	0.5513071851543513	226.0932571645625
EHV-1_dynamic_24h_barcode23_minion_FAN02079_20210212_p	453,493	210,225	0.46356834614867265	92	79	933.5298560286487	941.4210632815757	779.1701700558925	925.3455665724217	671.0	469.0	26,456	12,454	0.03896097148926073	40.48121115077233	0.037921674115774434	67.36500022064482	0.0424130556086976	44.261089005979194	0.540386099725161	507.44681353173956
EHV-1_dynamic_18h_barcode21_minion_FAN02079_20210212_p	779,437	296,339	0.380196218552622	91	79	771.0024979568586	627.2690082480747	553.9064753542395	535.6718357815513	619.0	398.0	35,686	9,381	0.03951488573536284	24.436847727150585	0.03840784009702792	52.73699652300039	0.04350132226203623	27.6194056307389	0.5356041113901566	297.0329330175336
EHV-1_dynamic_24h_barcode22_minion_FAN02079_20210212_p	491,374	232,238	0.4726298094730287	92	79	979.4624807173354	998.467547066636	860.8365168490944	1,020.6251306928796	685.0	482.0	27,353	12,630	0.038932202080232	44.425405084631045	0.03744661505351736	68.7189098690138	0.04255383472875465	48.81754649412975	0.5416907774791195	558.226112487956
EHV-1_dynamic_24h_barcode24_minion_FAN02079_20210212_p	363,678	170,070	0.46763895533961364	87	79	948.4461914110834	943.1489761007651	808.1093726112778	935.8753312861585	679.0	479.0	22,186	13,047	0.03870576467691554	40.47221173233566	0.0367559070273145	66.61798169390804	0.042274356560036336	44.59956881506368	0.5405007893140242	512.0409863079501
EHV-1_dynamic_2h_barcode17_minion_FAL91478_20210206_p	547,123	212	0.00038748142556609757	94	88	845.3607232742911	630.3241024108977	469.2877358490566	477.99173805603124	693.0	323.5	16,614	4,294	0.042145362803928076	26.682669188397124	0.03688850023620702	30.628136000008514	0.05072922634663129	33.62245573486875	0.5680426981877393	292.9147668311356
EHV-1_dynamic_1h_barcode13_minion_FAL91478_20210206_p	892,747	330	0.000369645599481152	95	79	1,033.3271408360936	894.7219256376553	368.1666666666667	288.82354302773206	770.0	293.5	66,612	2,635	0.03497263261862628	12.857638329261617	0.03942549076093666	32.38214188713986	0.03903864356557883	13.928514251588384	0.5488044775505165	169.84258870173602
EHV-1_dynamic_2h_barcode16_minion_FAL91478_20210206_p	772,578	230	0.00029770456834131957	83	95	767.3605422365121	591.6450627857714	463.4869565217391	393.01024721281453	612.0	328.5	27,192	2,522	0.04051518733232022	23.32209358878324	0.042081762068253876	44.76622906674913	0.04944560139584623	25.471915387625142	0.5847263653589989	257.44457122399285
EHV-1_dynamic_2h_barcode18_minion_FAL91478_20210206_p	577,787	224	0.0003876861196253983	92	95	878.0729040286473	642.8810732764875	475.36160714285717	411.52833220262886	717.0	337.0	20,513	2,509	0.046656210967214805	27.27248791462141	0.06017975037800171	67.3778392521859	0.05626355875696134	34.727542702201774	0.6041453404832787	274.2049749248591
EHV-1_dynamic_4h_barcode20_minion_FAN07037_20210212_p	510,687	13,569	0.02657009087758255	93	80	928.7940578084032	809.5528990040576	776.0750239516545	759.9749179129801	700.0	549.0	29,988	5,940	0.04207125887488246	36.14042186865536	0.037216437261373136	61.24294123937171	0.04939679382733799	41.83819101357026	0.5529297486686845	430.0665538743405
EHV-1_dynamic_4h_barcode21_minion_FAN07037_20210212_p	578,514	15,065	0.026040856401055117	94	81	916.3670040828744	763.9652524849064	772.4297378028543	742.0845227594424	707.0	555.0	20,677	7,092	0.041821042371802064	35.03318208435084	0.03678694923815729	60.571921419868694	0.049110251108265314	40.11049016525767	0.5543749088011038	422.92004672938015
EHV-1_dynamic_48h_barcode17_minion_FAN02079_20210212_p	592,560	262,866	0.4436107735925476	77	79	913.510029364115	824.310499388987	754.554031331553	783.3393361461972	684.0	482.0	28,424	11,802	0.039561121793869926	35.14587356845167	0.04091929985187545	76.40941201670853	0.042729887983963426	38.976283989598144	0.5445082144085152	430.14766121910736
EHV-1_dynamic_48h_barcode16_minion_FAN02079_20210212_p	638,470	291,641	0.4567810547089135	87	79	954.8884332858239	864.5797307023156	841.7667234716655	869.9479638390707	697.0	521.0	33,144	14,286	0.039341369789754554	39.02418272922703	0.03934075470265959	75.04234353929462	0.04269353742938785	42.73109674538253	0.5445662515585075	475.7848531803534
EHV-1_dynamic_6h_barcode22_minion_FAN07037_20210212_p	804,164	670,85	0.08342203829069693	91	79	781.8355434961028	592.6844592405448	553.7772080196766	473.83701000117395	632.0	409.0	18,203	5,894	0.041034995718993716	22.854725297223858	0.03496648626718647	41.24946320692225	0.04835464433193045	28.09061109276369	0.5417494747799632	269.5959843631684
EHV-1_dynamic_48h_barcode18_minion_FAN02079_20210212_p	572,058	263,242	0.46016662646095324	95	80	1,186.48347545179	1,099.4206217647193	904.8249709392878	879.0340439377079	840.0	617.0	26,884	14,316	0.03834972581629712	38.088733094288855	0.03853457145090074	80.27461226084002	0.041728985979075726	42.352013234521294	0.5479818740609175	485.30875566206646
EHV-1_dynamic_6h_barcode23_minion_FAN07037_20210212_p	851,456	70,050	0.08227083959711365	80	79	770.9437117126428	585.4738398479158	543.0546181299072	474.2681743226451	622.0	395.0	34,765	7,075	0.04110191599710796	22.965943519691784	0.03518831903787116	41.45029532475503	0.04839781187527891	28.35163298057944	0.5407642537878102	269.5333726656238
EHV-1_dynamic_4h_barcode19_minion_FAN07037_20210212_p	467,251	13,016	0.02785654819358332	88	80	921.6181324384538	836.9239255769132	740.5040719114935	718.1531910552471	685.0	515.0	19,299	5,948	0.042703245071459464	34.48770959495546	0.0364342591680923	49.30532146696132	0.05099704816182684	40.63184230759471	0.5541432650498771	413.5017902221598
EHV-1_dynamic_8h_barcode08_minion_FAN02013_20210218_p	682,048	100,560	0.1474383034625129	93	79	1,003.9503422046542	849.4794557053947	748.7722653142403	764.6552559256761	771.0	483.0	22,849	12,279	0.039328487594894636	34.00594988275608	0.03745591812659543	57.196416083143184	0.043987147935179334	38.51242501256855	0.5509977689678406	428.2916834314291
EHV-1_dynamic_6h_barcode24_minion_FAN07037_20210212_p	830,437	65,110	0.0784045026895478	79	79	758.0987516211344	579.2404791095755	538.4597757640915	475.2926956208237	608.0	390.0	25,387	5,954	0.041119633478493865	22.509602140032122	0.03564955830603373	40.4914624620158	0.04685808392887031	26.825555928608804	0.5417912990162103	269.7440866417476
EHV-1_dynamic_8h_barcode09_minion_FAN02013_20210218_p	848,423	131,007	0.1544123627011526	80	79	1,093.003844780257	976.0659271168557	766.6231957070996	770.3639891020222	805.0	512.0	23,453	12,146	0.03920975977966606	34.395153892860385	0.038000605478248906	63.404859497701175	0.044413118974185824	39.923784652332515	0.5532783570500555	436.203849608297
EHV-1_dynamic_8h_barcode07_minion_FAN02013_20210218_p	552,327	77,363	0.14006738761639392	84	81	962.9402908059899	837.143491704612	711.7015498364851	730.5237120386864	743.0	479.0	155,524	10,418	0.03908637380447908	32.35300347845317	0.03765737081575965	54.823128846741696	0.043947926244775025	36.81839501125335	0.5514360344898263	409.3995677754987
EHV-1_mock_barcode22_20210414_FAN01995_RK-13	802,622	1	1.2459165086429227e-06	96	224	1,068.0641784052766	0	224.0	0	808.0	224.0	43,872	224	0.026785714285714284	0	0.008928571428571428	0	0.03125	0	0.47767857142857145	0
EHV-1_mock_barcode23_20210414_FAN01995_RK-13	571,186	0	0.0	95	0	958.1537240058404	0	0	0	724.0	0	55,878	0	0	0	0	0	0	0	0	0
EHV-1_mock_barcode24_20210414_FAN01995_RK-13	583,325	2	3.428620408862984e-06	90	329	980.4985282646895	872.85007804391	818.5	692.25753878163	739.0	818.5	37,706	1,308	0.06597434331093463	49.49747468305833	0.10079413561392792	48.79036790187178	0.06414172266340867	58.68986283848344	0.5607819181429444	414.36457377531684
