# Supplementary material for: Hybrid Sequencing Reveals Novel Features in the Transcriptomic Organization of Equid Alphaherpesvirus 1
Source: Preprints.org preprint supplement (doi:10.20944/preprints202206.0219.v1), 2022-06-15
Supplement: Supplementary file 2 [file Supplementary Table S2.xlsx]

## Sheet: A. monocistronic
Transcript	Type	Count	Start/Stop	Start/Stop	Strand
ORF1	Long	61	948	1,923	+
ORF1	Long	84	989	1,923	+
ORF1	Canonic	1.032	1,252	1,923	+
ORF2	Canonic	1.443	1,918	2,672	-
ORF2	Short	101	1,918	2,616	-
ORF2	Long	152	1,918	3,584	-
ORF3	Long	36	1,931	3,632	+
ORF3	Canonic	1,672	2,669	3,632	+
ORF3	Short	88	2,729	3,632	+
ORF3	Short	510	2,778	3,632	+
ORF4	Canonic	1,045	3,635	4,312	-
ORF4	Long	214	3,635	4,338	-
ORF4	Long	107	3,635	4,379	-
ORF4	Long	3	3,635	5,278	-
ORF4	Long	5	3,635	4,642	-
ORF5	Canonic	1,973	4,391	5,952	-
ORF5	Long	25	4,391	6,017	-
ORF5	Long	29	4,391	6,509	-
ORF5	Long	44	4,391	6,901	-
ORF8	Long	89	7,110	11,067	+
ORF8	Long	71	7,689	11,067	+
ORF8	Long	47	9,711	11,067	+
ORF8	Canonic	1,576	10,080	11,067	+
ORF9	Canonic	1,714	11,064	12,260	-
ORF11	Long	320	12,156	13,520	+
ORF11	Canonic	2,384	12,468	13,520	+
ORF12	Long	5	12,562	14,971	+
ORF12	Long	13	12,640	14,971	+
ORF12	Long	29	12,661	14,971	+
ORF12	Long	146	12,875	14,971	+
ORF12	Long	6	13,016	14,971	+
ORF12	Long	8	13,213	14,971	+
ORF12	Canonic	4,531	13,528	14,971	+
ORF12	AT	4	13,528	15,940	+
ORF12	AT	24	13,528	15,898	+
ORF12	AT	9	13,528	16,341	+
ORF12	Short	554	13,560	14,971	+
ORF12	Short	359	13,591	14,971	+
ORF14	Long	9	15,563	20,385	+
ORF14	Long	11	15,647	20,385	+
ORF14	Long	6	15,982	20,385	+
ORF14	Long	7	16,505	20,385	+
ORF14	Long	56	16,796	20,385	+
ORF14	Long	15	16,962	20,385	+
ORF14	Long	24	17,231	20,385	+
ORF14	Long	193	17,459	20,385	+
ORF14	Long	234	17,484	20,385	+
ORF14	Long	81	17,534	20,385	+
ORF14	Long	235	17,591	20,385	+
ORF14	Long	239	17,637	20,385	+
ORF14	Long	97	17,698	20,385	+
ORF14	Long	413	17,716	20,385	+
ORF14	Long	54	17,806	20,385	+
ORF14	Long	58	17,866	20,385	+
ORF14	Long	62	17,896	20,385	+
ORF14	Canonic	1,081	17,985	20,385	+
ORF15	Canonic	27,322	20,383	21,209	-
ORF15	Long	95	20,383	21,441	-
ORF15	Long	132	20,383	21,616	-
ORF15	Long	207	20,383	21,270	-
ORF15	Long	155	20,383	21,321	-
ORF15	Long	171	20,383	21,675	-
ORF15	Long	94	20,383	21,721	-
ORF15	Long	108	20,383	21,897	-
ORF15	Long	62	20,383	22,415	-
ORF15	Long	100	20,383	21,932	-
ORF15	Long	85	20,383	22,145	-
ORF17	AT	16	22,942	24,276	-
ORF17	Canonic	105	23,010	24,276	-
ORF17	Long	12	23,010	24,630	-
ORF18	Canonic	3,412	24,413	25,769	-
ORF18	Long	7	24,413	26,807	-
ORF18	Long	7	24,413	27,011	-
ORF18	Long	18	24,413	26,107	-
ORF18	Long	74	24,413	25,863	-
ORF18	Long	5	24,413	27,731	-
ORF19	Long	36	24,839	27,784	+
ORF19	Long	46	24,861	27,784	+
ORF19	Long	172	25,481	27,784	+
ORF19	Long	56	26,092	27,784	+
ORF19	Long	212	26,127	27,784	+
ORF19	Canonic	327	26,161	27,784	+
ORF20	Canonic	3,144	27,868	28,983	-
ORF20	Long	39	27,868	29,138	-
ORF20	Long	89	27,868	29,321	-
ORF20	Long	77	27,868	29,044	-
ORF20	Long	38	27,868	30,118	-
ORF22	Canonic	3,455	31,489	33,053	-
ORF22	Short	49	31,489	32,973	-
ORF22	Long	50	31,489	33,114	-
ORF22	Long	14	31,489	35,525	-
ORF22	Long	28	31,489	35,022	-
ORF22	Long	14	31,489	35,409	-
ORF22	Long	39	31,489	33,642	-
ORF23	Long	3	32,802	36,380	+
ORF23	Long	145	33,145	36,380	+
ORF23	Canonic	531	33,237	36,380	+
ORF24	Canonic	8	36,497	46,890	+
ORF25	Canonic	65,148	46,895	47,374	-
ORF25	Long	63	46,895	47,736	-
ORF25	Long	88	46,895	47,864	-
ORF25	Long	373	46,895	47,635	-
ORF25	Long	15	46,895	48,086	-
ORF29	Long	35	50,165	51,693	+
ORF29	Long	108	50,447	51,693	+
ORF29	Long	103	50,521	51,693	+
ORF29	Canonic	5,323	50,573	51,693	+
ORF30	Canonic	140	51,486	55,192	-
ORF30	Long	15	51,486	55,662	-
ORF30	Long	20	51,486	55,708	-
ORF31	Long	41	55,046	59,182	+
ORF31	Long	50	55,255	59,182	+
ORF31	Canonic	4,335	55,322	59,182	+
ORF33	Long	17	59,993	64,402	+
ORF33	Long	3	60,473	64,402	+
ORF33	Long	32	61,255	64,402	+
ORF33	Canonic	654	61,312	64,402	+
ORF34	Long	15	61,608	65,093	+
ORF34	Long	27	63,269	65,093	+
ORF34	Long	24	63,642	65,093	+
ORF34	Long	61	63,733	65,093	+
ORF34	Long	31	63,831	65,093	+
ORF34	Long	44	63,876	65,093	+
ORF34	Long	46	63,952	65,093	+
ORF34	Long	70	64,005	65,093	+
ORF34	Long	317	64,136	65,093	+
ORF34	Long	90	64,227	65,093	+
ORF34	Long	178	64,279	65,093	+
ORF34	Canonic	17,500	64,488	65,093	+
ORF35.5	Canonic	12,024	65,089	66,263	-
ORF35	Canonic	21	65,089	68,273	-
ORF35	Short	8	65,089	67,484	-
ORF35	Short	4	65,089	67,426	-
ORF35.5	Long	56	65,089	66,397	-
ORF35	Long	15	65,089	68,860	-
ORF36	Canonic	581	67,167	69,054	-
ORF36	Short	33	67,167	68,991	-
ORF36	Long	34	67,167	69,244	-
ORF36	Long	12	67,167	69,165	-
ORF36	Long	87	67,167	69,363	-
ORF36	Long	8	67,167	69,696	-
ORF36	Long	8	67,167	69,663	-
ORF36	Long	9	67,167	69,574	-
ORF37	Canonic	149	69,068	70,113	-
ORF38	Long	26	69,221	71,034	+
ORF38	Long	166	69,754	71,034	+
ORF38	Canonic	763	69,782	71,034	+
ORF39	Long	4	70,672	73,833	+
ORF39	Long	3	70,750	73,833	+
ORF39	Long	6	70,837	73,833	+
ORF39	Long	13	70,903	73,833	+
ORF39	Long	39	71,038	73,833	+
ORF39	Canonic	456	71,119	73,833	+
ORF40	Short-AT	25	73,834	76,272	-
ORF40	Long-AT	12	73,834	77,251	-
ORF40	Long-AT	61	73,834	77,028	-
ORF40	Long-AT	9	73,834	76,917	-
ORF40	Long-AT	18	73,834	76,458	-
ORF40	Long-AT	9	73,834	77,340	-
ORF40	AT	326	73,834	76,361	-
ORF40	Canonic	960	74,614	76,361	-
ORF40	Short	51	74,614	76,272	-
ORF40	Long	75	74,614	77,028	-
ORF40	Long	10	74,614	76,917	-
ORF40	Long	30	74,614	76,458	-
ORF40	Long	12	74,614	77,340	-
ORF40	Long	19	74,614	77,251	-
ORF42	Long	5	77,081	81,894	+
ORF42	Long	381	77,362	81,894	+
ORF42	Long	218	77,505	81,894	+
ORF42	Canonic	5,108	77,591	81,894	+
ORF43	Long	3	78,509	83,096	+
ORF43	Long	10	78,636	83,096	+
ORF43	Long	12	79,161	83,096	+
ORF43	Long	18	79,666	83,096	+
ORF43	Long	21	79,748	83,096	+
ORF43	Long	7	79,796	83,096	+
ORF43	Long	15	79,844	83,096	+
ORF43	Long	11	79,912	83,096	+
ORF43	Long	35	79,946	83,096	+
ORF43	Long	27	79,972	83,096	+
ORF43	Long	13	80,118	83,096	+
ORF43	Long	505	80,246	83,096	+
ORF43	Long	391	80,267	83,096	+
ORF43	Long	18	80,625	83,096	+
ORF43	Long	15	80,720	83,096	+
ORF43	Long	21	80,796	83,096	+
ORF43	Long	14	80,818	83,096	+
ORF43	Long	13	80,829	83,096	+
ORF43	Long	22	80,841	83,096	+
ORF43	Long	25	80,872	83,096	+
ORF43	Long	23	80,927	83,096	+
ORF43	Long	40	81,008	83,096	+
ORF43	Long	16	81,077	83,096	+
ORF43	Long	27	81,174	83,096	+
ORF43	Long	36	81,201	83,096	+
ORF43	Long	36	81,333	83,096	+
ORF43	Long	32	81,395	83,096	+
ORF43	Long	29	81,436	83,096	+
ORF43	Long	74	81,495	83,096	+
ORF43	Long	95	81,557	83,096	+
ORF43	Canonic	5,622	81,905	83,096	+
ORF43	Short	264	81,973	83,096	+
ORF43	Short	149	82,012	83,096	+
ORF43	Short	272	82,064	83,096	+
ORF44	Canonic	5	83,090	89,226	-
ORF44	Short	3	83,090	88,988	-
ORF46	Long	33	84,815	87,824	+
ORF46	Long	49	86,239	87,824	+
ORF46	Canonic	1,476	86,362	87,824	+
ORF46	Short	25	86,581	87,824	+
ORF51	Long	113	91,206	93,028	+
ORF51	Long	39	91,890	93,028	+
ORF51	Long	54	91,987	93,028	+
ORF51	Long	134	92,248	93,028	+
ORF51	Long	571	92,378	93,028	+
ORF51	Long	1,101	92,409	93,028	+
ORF51	Long	103	92,502	93,028	+
ORF51	Canonic	2,890	92,730	93,028	+
ORF52	Canonic	5,033	93,031	94,747	-
ORF52	Short	60	93,031	94,636	-
ORF52	Short	3,062	93,031	94,551	-
ORF52	Short	108	93,031	94,617	-
ORF52	Long	31	93,031	95,061	-
ORF52	Long	95	93,031	95,145	-
ORF52	Long	67	93,031	94,806	-
ORF52	Long	41	93,031	94,842	-
ORF52	Long	24	93,031	95,921	-
ORF52	Long	21	93,031	95,998	-
ORF52	Long	88	93,031	96,281	-
ORF52	Long	85	93,031	96,360	-
ORF53	Canonic	37	94,358	98,004	+
ORF54	Long	11	94,861	99,345	+
ORF54	Long	11	95,115	99,345	+
ORF54	Long	21	95,199	99,345	+
ORF54	Long	169	95,968	99,345	+
ORF54	Long	34	96,106	99,345	+
ORF54	Canonic	9,174	96,454	99,345	+
ORF54	Short	52	96,796	99,345	+
ORF54	Short	60	96,842	99,345	+
ORF54	Short	119	96,925	99,345	+
ORF54	Short	66	96,948	99,345	+
ORF54	Short	79	97,020	99,345	+
ORF56	Canonic	155	99,349	100,462	-
ORF55	Long	28	99,349	101,555	-
ORF57	Canonic	45	102,277	105,147	+
ORF58	Long	38	102,672	105,836	+
ORF58	Long	36	102,740	105,836	+
ORF58	Long	16	102,806	105,836	+
ORF58	Long	29	102,955	105,836	+
ORF58	Long	163	103,143	105,836	+
ORF58	Long	23	103,207	105,836	+
ORF58	Long	61	103,229	105,836	+
ORF58	Long	30	103,347	105,836	+
ORF58	Long	52	103,399	105,836	+
ORF58	Long	86	103,561	105,836	+
ORF58	Long	624	103,733	105,836	+
ORF58	Long	52	103,923	105,836	+
ORF58	Long	122	104,079	105,836	+
ORF58	Long	137	104,206	105,836	+
ORF58	Long	111	104,226	105,836	+
ORF58	Long	86	104,254	105,836	+
ORF58	Long	100	104,354	105,836	+
ORF58	Long	147	104,414	105,836	+
ORF58	Long	143	104,496	105,836	+
ORF58	Long	91	104,558	105,836	+
ORF58	Long	195	104,591	105,836	+
ORF58	Long	310	104,640	105,836	+
ORF58	Long	109	104,723	105,836	+
ORF58	Long	112	104,753	105,836	+
ORF58	Long	180	104,772	105,836	+
ORF58	Long	285	104,814	105,836	+
ORF58	Long	97	104,890	105,836	+
ORF58	Long	113	104,908	105,836	+
ORF58	Canonic	1,651	105,006	105,836	+
ORF60	Canonic	18,640	105,829	106,504	-
ORF59	Short	3,059	105,829	106,443	-
ORF59	Short	1,578	105,829	106,475	-
ORF59	Long	74	105,829	106,940	-
ORF59	Long	144	105,829	107,059	-
ORF59	Long	5,213	105,829	106,674	-
ORF59	Long	104	105,829	106,801	-
ORF63	Canonic	833	110,319	112,033	-
ORF63	Long	36	110,319	112,211	-
ORF63	Long	61	110,319	112,144	-
ORF63	Long	42	110,319	112,623	-
ORF64	Canonic	20	113,821	118,756	-
ORF64	Long	4	113,821	119,214	-
IGEN	Canonic	557	118,878	119,857	+
ORF65	Long	23	120,072	122,451	+
ORF65	Canonic	266	121,002	122,451	+
ORF65	Short	239	121,300	122,451	+
ORF65	Short	62	121,325	122,451	+
ORF66	Long	84	122,758	123,602	+
ORF66	Canonic	345	122,825	123,602	+
ORF67	Canonic	7,139	124,283	125,335	-
ORF67	Long	119	124,283	125,235	-
ORF67	Long	7	124,283	125,924	-
ORF69	Canonic	9	126,338	127,862	+
ORF70	Long	93	126,413	128,944	+
ORF70	Long	36	126,875	128,944	+
ORF70	Canonic	2,156	127,634	128,944	+
ORF71	Canonic	614	129,051	131,601	+
ORF73	Long	16	132,015	134,249	+
ORF73	Long	21	132,176	134,249	+
ORF73	Long	312	132,500	134,249	+
ORF73	Long	56	132,797	134,249	+
ORF73	Canonic	853	132,857	134,249	+
ORF73	Short	281	132,880	134,249	+
ORF75	Long	42	134,466	136,464	+
ORF75	Long	45	134,557	136,464	+
ORF75	Canonic	4,689	135,564	136,464	+
ORF75	Short	61	135,669	136,464	+
ORF75	Short	117	136,024	136,464	+
ORF67.1	Long	17	137,292	138,877	+
ORF67	Canonic	7,144	137,825	138,877	+
ORF67.1	Short	122	137,925	138,877	+
ORF66	Canonic	345	139,558	140,335	-
ORF66.1	Long	84	139,558	140,402	-
ORF65	Canonic	264	140,709	142,158	-
ORF65.1	Short	239	140,709	141,860	-
ORF65.1	Short	63	140,709	141,835	-
ORF65.1	Long	22	140,709	143,088	-
IGEN	Canonic	556	143,303	144,282	-
ORF64.1	Long	4	143,946	149,339	+
ORF64	Canonic	20	144,404	149,339	+
ORF65	Long-Splice	9	120,072	122,451	+
ORF65	Long-Splice	5	120,072	122,451	+
ORF65	Long-Splice	5	120,382	122,451	+
ORF65	Long-Splice	3	120,382	122,451	+
ORF65	Splice	901	121,002	122,451	+
ORF65	Splice	926	121,002	122,451	+
ORF65	Splice	1,297	140,709	142,158	-
ORF65	Splice	1,415	140,709	142,158	-
ORF65	Splice	159	140,709	142,158	-
ORF65	Splice	83	140,709	142,158	-
ORF65	Long-Splice	12	140,709	143,088	-
ORF65	Long-Splice	7	140,709	143,088	-
ORF65	Splice-Long	5	140,709	142,778	-
ORF65	Splice-Long	6	140,709	142,778	-
ORF65	Splice-Long	3	140,709	143,622	-
ORF65	Splice-Long	3	140,709	143,601	-

## Sheet: B. multicistronic
Transcript	Type	Isoform	Type2	Count	Start/Stop	Start/Stop	Strand
ORF1, ORF2, ORF3	Complex	Long	tricistonic	16	989	3,632	+
ORF1, ORF2, ORF3	Complex	Canonic	tricistonic	26	1,252	3,632	+
ORF3, ORF2	Complex	Short	bicistronic	5	1,918	4,171	-
ORF3, ORF2	Complex	Canonic	bicistronic	27	1,918	4,226	-
ORF4, ORF3, ORF2	Complex	Canonic	tricistonic	16	1,918	4,312	-
ORF4, ORF3, ORF2	Complex	Long	tricistonic	8	1,918	4,338	-
ORF4, ORF3, ORF2	Complex	Long	tricistonic	5	1,918	4,379	-
ORF5, ORF4, ORF3, ORF2	Complex	Canonic	tetracistronic	4	1,918	5,952	-
ORF6, ORF5, ORF4, ORF3, ORF2	Complex	Canonic	pentacistronic	20	1,918	7,400	-
ORF4, ORF5	Polycistronic	Canonic	bicistronic	58	3,635	5,952	-
ORF6, ORF5, ORF4	Polycistronic	Canonic	tricistonic	92	3,635	7,400	-
ORF5,ORF6, ORF7, ORF8	Complex	Canonic	tetracistronic	7	3,872	11,067	+
ORF5, ORF6	Polycistronic	Long	bicistronic	24	4,391	7,535	-
ORF5, ORF6	Polycistronic	Canonic	bicistronic	2,411	4,391	7,400	-
ORF7, ORF6, ORF5	Polycistronic	Canonic	tricistonic	19	4,391	10,331	-
ORF9, ORF8, ORF7, ORF6, ORF5	Complex	Canonic	pentacistronic	3	4,391	12,260	-
ORF7, ORF8	Polycistronic	Long	bicistronic	20	6,149	11,067	+
ORF7, ORF8	Polycistronic	Canonic	bicistronic	59	6,466	11,067	+
ORF8, ORF9, ORF10, ORF11	Complex	Long	tetracistronic	3	7,110	13,520	+
ORF8, ORF9, ORF10, ORF11	Complex	Canonic	tetracistronic	5	10,080	13,520	+
ORF9, ORF10, ORF11	Complex	Canonic	tricistonic	4	10,875	13,520	+
ORF10, ORF9	Complex	Canonic	bicistronic	53	11,064	12,728	-
ORF10, ORF9	Complex	Long	bicistronic	39	11,064	12,785	-
ORF10, ORF9	Complex	Long	bicistronic	25	11,064	12,908	-
ORF10, ORF9	Complex	Long	bicistronic	39	11,064	13,390	-
ORF11, ORF10, ORF9	Complex	Long	tricistonic	10	11,064	14,907	-
ORF12, ORF11, ORF10, ORF9	Complex	Short	tetracistronic	10	11,064	15,032	-
ORF12, ORF11, ORF10, ORF9	Complex	Canonic	tetracistronic	12	11,064	15,699	-
ORF10, ORF11	Polycistronic	Canonic	bicistronic	1,008	11,990	13,520	+
ORF10, ORF11, ORF12	Polycistronic	Canonic	tricistonic	60	11,990	14,971	+
ORF11, ORF12	Polycistronic	Canonic	bicistronic	72	12,156	14,971	+
ORF11, ORF12	Polycistronic	Short	bicistronic	70	12,468	14,971	+
ORF12, ORF13, ORF14	Polycistronic	Canonic	tricistonic	17	13,528	20,385	+
ORF13, ORF14	Polycistronic	Long	bicistronic	794	15,083	20,385	+
ORF13, ORF14	Polycistronic	Canonic	bicistronic	1,060	15,234	20,385	+
ORF15, ORF16	Polycistronic	Short	bicistronic	1,095	20,383	22,893	-
ORF15, ORF16	Polycistronic	Long	bicistronic	11	20,383	23,631	-
ORF15, ORF16	Polycistronic	Canonic	bicistronic	5,757	20,383	22,919	-
ORF17, ORF16, ORF15	Polycistronic	Canonic	tricistonic	6	20,383	24,276	-
ORF18, ORF17, ORF16, ORF15	Polycistronic	Canonic	tetracistronic	8	20,383	25,769	-
ORF16, ORF17, ORF18, ORF19	Complex	Canonic	tetracistronic	23	21,328	27,784	+
ORF17, ORF18, ORF19	Complex	Canonic	tricistonic	12	21,474	27,784	+
ORF17, ORF18, ORF19	Complex	Short	tricistonic	11	21,493	27,784	+
ORF17, ORF18, ORF19	Complex	Short	tricistonic	10	22,580	27,784	+
ORF17, ORF18	Polycistronic	Canonic	bicistronic	39	23,010	25,769	-
ORF18, ORF19	Complex	Long	bicistronic	32	23,079	27,784	+
ORF18, ORF19	Complex	Canonic	bicistronic	69	23,099	27,784	+
ORF18, ORF19	Complex	Short	bicistronic	15	23,686	27,784	+
ORF18, ORF19	Complex	Short	bicistronic	10	23,857	27,784	+
ORF20, ORF21	Polycistronic	Long	bicistronic	6	27,868	32,808	-
ORF20, ORF21	Polycistronic	Long	bicistronic	5	27,868	32,829	-
ORF20, ORF21	Polycistronic	Canonic	bicistronic	812	27,868	31,344	-
ORF22, ORF21, ORF20	Polycistronic	Canonic	tricistonic	44	27,868	33,053	-
ORF21, ORF22, ORF23	Complex	Long	tricistonic	4	28,131	36,380	+
ORF21, ORF22, ORF23	Complex	Canonic	tricistonic	7	28,668	36,380	+
ORF23, ORF22	Complex	Canonic	bicistronic	14	31,489	36,847	-
ORF25, ORF26	Polycistronic	Long	bicistronic	94	46,895	48,298	-
ORF25, ORF26	Polycistronic	Long	bicistronic	127	46,895	48,504	-
ORF25, ORF26	Polycistronic	Canonic	bicistronic	626	46,895	48,286	-
ORF27, ORF26, ORF25	Polycistronic	Long	tricistonic	9	46,895	50,613	-
ORF27, ORF26, ORF25	Polycistronic	Long	tricistonic	25	46,895	50,520	-
ORF27, ORF26, ORF25	Polycistronic	Canonic	tricistonic	39	46,895	49,982	-
ORF28, ORF27, ORF26, ORF25	Complex	Canonic	tetracistronic	21	46,895	50,913	-
ORF28, ORF29	Polycistronic	Canonic	bicistronic	98	48,421	51,693	+
ORF28, ORF29	Polycistronic	Short	bicistronic	17	48,558	51,693	+
ORF29, ORF30, ORF31	Complex	Canonic	tricistonic	5	50,573	59,182	+
ORF31, ORF30	Complex	Canonic	bicistronic	7	51,486	59,824	-
ORF32, ORF33	Polycistronic	Polycistronic-Short-	bicistronic	13	59,209	64,402	+
ORF32, ORF33, ORF34	Polycistronic	Canonic	tricistonic	17	59,209	65,093	+
ORF33, ORF34	Polycistronic	Long	bicistronic	48	59,993	65,093	+
ORF33, ORF34	Polycistronic	Long	bicistronic	21	60,473	65,093	+
ORF33, ORF34	Polycistronic	Long	bicistronic	29	61,255	65,093	+
ORF33, ORF34	Polycistronic	Canonic	bicistronic	1,405	61,312	65,093	+
ORF35.5, ORF34	Complex	Canonic	bicistronic	177	64,367	66,263	-
ORF34, ORF35	Complex	Canonic	bicistronic	13	64,488	67,175	+
ORF34, ORF35, ORF36, ORF37, ORF38	Complex	Canonic	pentacistronic	4	64,488	71,034	+
ORF35, ORF36, ORF37, ORF38	Complex	Canonic	tetracistronic	7	64,686	71,034	+
ORF36, ORF35	Complex	Short	bicistronic	7	65,089	68,991	-
ORF36, ORF35	Complex	Canonic	bicistronic	125	65,089	69,054	-
ORF36, ORF35	Complex	Long	bicistronic	7	65,089	69,244	-
ORF36, ORF35	Complex	Long	bicistronic	39	65,089	69,363	-
ORF37, ORF36, ORF35	Complex	Canonic	tricistonic	40	65,089	70,113	-
ORF39, ORF38, ORF37, ORF36, ORF35	Complex	Canonic	pentacistronic	6	65,089	74,183	-
ORF36, ORF37, ORF38	Complex	Canonic	tricistonic	16	66,315	71,034	+
ORF36, ORF37, ORF38	Complex	Short	tricistonic	9	66,600	71,034	+
ORF36, ORF37, ORF38	Complex	Short	tricistonic	10	66,701	71,034	+
ORF36, ORF37	Polycistronic	Canonic	bicistronic	97	67,167	70,113	-
ORF38, ORF37, ORF36	Complex	Canonic	tricistonic	8	67,167	71,118	-
ORF38, ORF37, ORF36	Complex	Long	tricistonic	6	67,167	73,174	-
ORF39, ORF38, ORF37, ORF36	Complex	Canonic	tetracistronic	9	67,167	74,183	-
ORF37, ORF38	Complex	Long	bicistronic	27	67,656	71,034	+
ORF37, ORF38	Complex	Long	bicistronic	54	68,373	71,034	+
ORF37, ORF38	Complex	Long	bicistronic	26	68,916	71,034	+
ORF37, ORF38	Complex	Canonic	bicistronic	75	69,019	71,034	+
ORF38, ORF37	Complex	Short	bicistronic	6	69,068	71,118	-
ORF38, ORF37	Complex	Canonic	bicistronic	7	69,068	73,174	-
ORF39, ORF38, ORF37	Complex	Canonic	tricistonic	10	69,068	74,183	-
ORF41, ORF42	Polycistronic	Canonic	bicistronic	65	76,515	81,894	+
ORF41, ORF42, ORF43	Polycistronic	Long	tricistonic	15	76,515	83,096	+
ORF41, ORF42	Polycistronic	Short	bicistronic	18	76,649	81,894	+
ORF41, ORF42, ORF43	Polycistronic	Long	tricistonic	5	76,649	83,096	+
ORF41, ORF42	Polycistronic	Short	bicistronic	60	76,722	81,894	+
ORF41, ORF42, ORF43	Polycistronic	Canonic	tricistonic	25	76,722	83,096	+
ORF42, ORF43	Polycistronic	Long	bicistronic	6	77,081	83,096	+
ORF42, ORF43	Polycistronic	Long	bicistronic	78	77,362	83,096	+
ORF42, ORF43	Polycistronic	Long	bicistronic	102	77,505	83,096	+
ORF42, ORF43	Polycistronic	Canonic	bicistronic	1,178	77,591	83,096	+
ORF42, ORF43, ORF45, ORF46	Polycistronic	Canonic	tetracistronic	6	77,591	87,824	+
ORF43, ORF45, ORF46	Polycistronic	Canonic	tricistonic	24	81,905	87,824	+
ORF45, ORF46	Polycistronic	Long	bicistronic	15	82,842	87,824	+
ORF45, ORF46	Polycistronic	Long	bicistronic	101	84,189	87,824	+
ORF45, ORF46	Polycistronic	Long	bicistronic	9	84,295	87,824	+
ORF45, ORF46	Polycistronic	Canonic	bicistronic	311	84,369	87,824	+
ORF46, ORF48, ORF49, ORF50, ORF51	Polycistronic	Canonic	pentacistronic	7	86,362	93,028	+
ORF48, ORF49, ORF50, ORF51	Polycistronic	Long	tetracistronic	62	87,846	93,028	+
ORF48, ORF49, ORF50, ORF51	Polycistronic	Long	tetracistronic	103	88,297	93,028	+
ORF48, ORF49, ORF50, ORF51	Polycistronic	Long	tetracistronic	57	88,429	93,028	+
ORF48, ORF49, ORF50, ORF51	Polycistronic	Canonic	tetracistronic	183	88,589	93,028	+
ORF49, ORF50, ORF51	Polycistronic	Long	tricistonic	68	89,189	93,028	+
ORF49, ORF50, ORF51	Polycistronic	Canonic	tricistonic	91	89,351	93,028	+
ORF50, ORF51	Polycistronic	Long	bicistronic	44	90,226	93,028	+
ORF50, ORF51	Polycistronic	Long	bicistronic	11	90,586	93,028	+
ORF50, ORF51	Polycistronic	Long	bicistronic	374	90,686	93,028	+
ORF50, ORF51	Polycistronic	Canonic	bicistronic	367	90,722	93,028	+
ORF51, ORF52, ORF53, ORF54	Complex	Canonic	tetracistronic	4	92,409	99,345	+
ORF52, ORF53, ORF54	Complex	Canonic	tricistonic	4	92,786	99,345	+
ORF53. ORF52	Complex	Canonic	bicistronic	8	93,031	98,109	-
ORF53, ORF54	Polycistronic	Canonic	bicistronic	81	94,358	99,345	+
ORF54, ORF55, ORF56, ORF57	Complex	Canonic	tetracistronic	4	96,454	105,147	+
ORF54, ORF55, ORF56, ORF57, ORF58	Complex	Canonic	pentacistronic	381	96,454	105,836	+
ORF55, ORF56, ORF57, ORF58	Complex	Long	tetracistronic	5	97,150	105,836	+
ORF55, ORF56, ORF57, ORF58	Complex	Long	tetracistronic	3	97,642	105,836	+
ORF55, ORF56, ORF57, ORF58	Complex	Long	tetracistronic	5	98,162	105,836	+
ORF55, ORF56, ORF57, ORF58	Complex	Canonic	tetracistronic	18	98,261	105,836	+
ORF55, ORF56, ORF57, ORF58	Complex	Short	tetracistronic	4	98,304	105,836	+
ORF55, ORF56, ORF57, ORF58	Complex	Short	tetracistronic	4	98,413	105,836	+
ORF55, ORF56, ORF57, ORF58	Complex	Short	tetracistronic	3	98,789	105,836	+
ORF55, ORF56, ORF57, ORF58	Complex	Short	tetracistronic	8	99,014	105,836	+
ORF55, ORF56, ORF57, ORF58	Complex	Short	tetracistronic	4	99,095	105,836	+
ORF55, ORF56, ORF57, ORF58	Complex	Short	tetracistronic	6	99,177	105,836	+
ORF55, ORF56	Polycistronic	Short	bicistronic	55	99,349	102,450	-
ORF55, ORF56	Polycistronic	Long	bicistronic	4	99,349	103,717	-
ORF55, ORF56	Polycistronic	Canonic	bicistronic	72	99,349	102,618	-
ORF56, ORF57, ORF58	Complex	Long	tricistonic	9	99,583	105,836	+
ORF56, ORF57, ORF58	Complex	Canonic	tricistonic	15	99,648	105,836	+
ORF56, ORF57, ORF58	Complex	Short	tricistonic	13	99,859	105,836	+
ORF56, ORF57, ORF58	Complex	Short	tricistonic	15	100,060	105,836	+
ORF56, ORF57, ORF58	Complex	Short	tricistonic	10	100,129	105,836	+
ORF57, ORF58	Polycistronic	Long	bicistronic	18	100,852	105,836	+
ORF57, ORF58	Polycistronic	Long	bicistronic	37	101,126	105,836	+
ORF57, ORF58	Polycistronic	Long	bicistronic	22	101,331	105,836	+
ORF57, ORF58	Polycistronic	Canonic	bicistronic	50	101,606	105,836	+
ORF57, ORF58	Polycistronic	Short	bicistronic	31	101,690	105,836	+
ORF57, ORF58	Polycistronic	Short	bicistronic	40	102,277	105,836	+
ORF57, ORF58	Polycistronic	Short	bicistronic	33	102,368	105,836	+
ORF59, ORF60	Polycistronic	Long	bicistronic	50	105,829	108,039	-
ORF59, ORF60	Polycistronic	Long	bicistronic	66	105,829	107,656	-
ORF59, ORF60	Polycistronic	Long	bicistronic	37	105,829	107,726	-
ORF59, ORF60	Polycistronic	Long	bicistronic	145	105,829	107,626	-
ORF59, ORF60	Polycistronic	Canonic	bicistronic	7,722	105,829	107,137	-
ORF61, ORF60, ORF59	Polycistronic	Canonic	tricistonic	1,282	105,829	108,317	-
ORF62, ORF61, ORF60, ORF59	Polycistronic	Long	tetracistronic	8	105,829	110,093	-
ORF62, ORF61, ORF60, ORF59	Polycistronic	Canonic	tetracistronic	3,738	105,829	108,732	-
ORF67, ORF68	Polycistronic	Long	bicistronic	24	124,283	126,611	-
ORF67, ORF68	Polycistronic	Canonic	bicistronic	284	124,283	126,358	-
ORF69, ORF68, ORF67	Complex	Canonic	tricistonic	20	124,283	127,577	-
ORF69, ORF68, ORF67	Complex	Long	tricistonic	7	124,283	128,030	-
ORF69, ORF68, ORF67	Complex	Long	tricistonic	12	124,283	128,110	-
ORF70, ORF69, ORF68, ORF67	Complex	Canonic	tetracistronic	8	124,283	129,214	-
ORF67, ORF68	Polycistronic	Canonic	bicistronic	947	126,338	128,944	+
ORF70, ORF71, ORF72, ORF73	Polycistronic	Canonic	tetracistronic	6	127,634	134,249	+
ORF71, ORF72, ORF73	Polycistronic	Canonic	tricistonic	134	129,051	134,249	+
ORF69, ORF70	Polycistronic	Long	bicistronic	8	129,474	134,249	+
ORF69, ORF70	Polycistronic	Long	bicistronic	19	130,020	134,249	+
ORF69, ORF70	Polycistronic	Long	bicistronic	6	130,201	134,249	+
ORF69, ORF70	Polycistronic	Long	bicistronic	6	130,853	134,249	+
ORF69, ORF70	Polycistronic	Long	bicistronic	8	130,929	134,249	+
ORF69, ORF70	Polycistronic	Long	bicistronic	10	131,035	134,249	+
ORF69, ORF70	Polycistronic	Long	bicistronic	18	131,126	134,249	+
ORF69, ORF70	Polycistronic	Canonic	bicistronic	1,203	131,515	134,249	+
ORF74, ORF75	Polycistronic	Canonic	bicistronic	638	134,347	136,464	+
ORF74, ORF75, ORF76, ORF67	Polycistronic	Canonic	tetracistronic	4	134,347	138,877	+
ORF75, ORF76, ORF67	Polycistronic	Canonic	tricistonic	11	135,564	138,877	+
ORF76, ORF67.1	Polycistronic	Long	bicistronic	24	136,555	138,877	+
ORF76, ORF67.1	Polycistronic	Canonic	bicistronic	152	136,583	138,877	+
ORF76, ORF67.1	Polycistronic	Short	bicistronic	56	136,601	138,877	+

## Sheet: C. fusion transcripts
Transcript	Type	Count	Start/Stop	Start/Stop	Strand
ORF7, ORF8	Splice	6	6,149	11,067	+
ORF7, ORF8	Splice	4	6,149	11,067	+
ORF7, ORF8	Splice	11	6,466	11,067	+
ORF7, ORF8	Splice	37	6,466	11,067	+
ORF8	Long-Splice	45	7,110	11,067	+
ORF8	Long-Splice	18	7,689	11,067	+
ORF8	Long-Splice	7	7,689	11,067	+
ORF12, ORF11, ORF10, ORF9	Short-Splice	11	11,064	15,032	-
ORF11, ORF10, ORF9	Splice	17	11,064	14,907	-
ORF10, ORF9	Splice	23	11,064	13,390	-
ORF12, ORF11, ORF10, ORF9	Short-Splice	4	11,064	15,032	-
ORF11, ORF10, ORF9	Splice	4	11,064	14,907	-
ORF36, ORF37, ORF38	Splice	47	66,315	71,034	+
ORF36, ORF37, ORF38	Splice	11	66,576	71,034	+
ORF36, ORF37, ORF38	Short-Splice	16	66,600	71,034	+
ORF36, ORF37, ORF38	Short-Splice	13	66,701	71,034	+
ORF37, ORF38	Long-Splice	35	68,373	71,034	+
ORF44	Splice	24	83,090	92,179	-
ORF44	Splice	11	83,090	92,062	-
ORF44	Short-Splice	47	83,090	88,988	-
ORF44	Splice	27	83,090	88,377	-
ORF44	NC-Splice	13	83,090	87,781	-
ORF44	NC-Splice	31	83,090	87,726	-
ORF44	NC-Splice	10	83,090	85,121	-
ORF44	Main-Splice	63	83,090	89,226	-
ORF44	NC-Splice	50	83,090	84,687	-
ORF44	Splice	4	83,090	90,427	-
ORF54, ORF55, ORF56, ORF57, ORF58	Splice	230	96,454	105,836	+
ORF54, ORF55, ORF56, ORF57, ORF58	Splice	16	96,454	105,836	+
ORF54, ORF55, ORF56, ORF57, ORF58	Splice	11	96,454	105,836	+
ORF54, ORF55, ORF56, ORF57, ORF58	Splice	16	96,454	105,836	+
ORF54, ORF55, ORF56, ORF57, ORF58	Splice	10	96,454	105,836	+
ORF54, ORF55, ORF56, ORF57, ORF58	Splice	18	96,454	105,836	+
ORF54, ORF55, ORF56, ORF57, ORF58	Splice	7	96,454	105,836	+
ORF54	Splice	45	96,454	99,345	+
ORF53	NC-Splice	27	96,454	98,004	+
ORF53	NC-Splice	8	96,454	98,004	+
ORF54, ORF55, ORF56, ORF57, ORF58	Splice	84	96,454	105,836	+
ORF54	Splice	120	96,454	99,345	+
ORF54, ORF55, ORF56, ORF57, ORF58	Splice	4	96,454	105,836	+
ORF54, ORF55, ORF56, ORF57, ORF58	Splice	4	96,454	105,836	+
ORF54, ORF55, ORF56, ORF57, ORF58	Splice	4	96,454	105,836	+
ORF54, ORF55, ORF56, ORF57, ORF58	Splice	3	96,454	105,836	+
ORF55, ORF56, ORF57, ORF58	NC-Splice	5	97,088	105,836	+
ORF55, ORF56, ORF57, ORF58	NC-Splice	5	97,150	105,836	+
ORF55, ORF56, ORF57, ORF58	NC-Splice	3	97,269	105,836	+
ORF55, ORF56, ORF57, ORF58	NC-Splice	4	97,299	105,836	+
ORF55, ORF56, ORF57, ORF58	NC-Splice	4	97,332	105,836	+
ORF55, ORF56, ORF57, ORF58	NC-Splice	3	97,456	105,836	+
ORF55, ORF56, ORF57, ORF58	NC-Splice	8	97,560	105,836	+
ORF55, ORF56, ORF57, ORF58	NC-Splice	6	97,616	105,836	+
ORF55, ORF56, ORF57, ORF58	NC-Splice	8	97,881	105,836	+
ORF55, ORF56, ORF57, ORF58	NC-Splice	9	98,035	105,836	+
ORF58	Long-Splice	9	102,672	105,836	+
ORF58	Long-Splice	3	102,740	105,836	+
ORF58	Long-Splice	3	102,806	105,836	+
ORF58	Long-Splice	9	103,143	105,836	+
ORF58	Long-Splice	3	103,143	105,836	+
ORF58	Long-Splice	3	103,143	105,836	+
ORF58	Long-Splice	4	103,207	105,836	+
ORF58	Long-Splice	3	103,229	105,836	+
ORF58	Long-Splice	7	103,561	105,836	+
ORF58	Long-Splice	18	103,733	105,836	+
ORF58	Long-Splice	139	103,733	105,836	+
ORF58	Long-Splice	4	104,079	105,836	+
ORF58	Long-Splice	12	104,206	105,836	+
ORF58	Long-Splice	3	104,206	105,836	+
ORF58	Long-Splice	11	104,226	105,836	+
ORF58	Long-Splice	5	104,254	105,836	+
ORF58	Long-Splice	3	104,354	105,836	+
ORF58	Splice	105	105,006	105,836	+

## Sheet: D. nested mRNAs
Transcript	Type	Count	Start/Stop	Start/Stop	Strand
ORF2	*	10	1,803	2,540	-
ORF2	Short	158	1,918	2,417	-
ORF2	Short	75	1,918	2,400	-						*= (<5%)
ORF2	Canonic	1,457	1,918	2,540	-
ORF2	*	57	1,918	2,259	-
ORF3	Canonic	110	3,039	3,632	+
ORF3	*	36	3,119	3,632	+
ORF3	*	47	3,281	3,632	+
ORF3	*	81	3,296	3,632	+
ORF3	*	53	3,428	3,632	+
ORF4	*	30	3,635	4,171	-
ORF4	Canonic	211	3,635	4,226	-
ORF5	*	64	4,391	5,098	-
ORF5	Long	118	4,391	5,053	-
ORF5	Canonic	157	4,391	4,837	-
ORF5	Long	99	4,391	5,278	-
ORF8	*	36	10,568	11,067	+
ORF8	*	39	10,638	11,067	+
ORF8	*	77	10,811	11,067	+
ORF9	Short	94	11,064	11,522	-
ORF9	*	33	11,064	11,789	-
ORF9	Canonic	175	11,064	11,621	-
ORF9	*	41	11,064	11,725	-
ORF9	*	31	11,064	11,467	-
ORF11	Long	174	12,562	13,520	+
ORF11	Long	194	12,640	13,520	+
ORF11	Long	289	12,661	13,520	+
ORF11	Canonic	1,410	12,875	13,520	+
ORF11	Short	357	13,016	13,520	+
ORF11	Short	344	13,213	13,520	+
ORF11	Short	246	13,247	13,520	+
ORF12	*	43	14,080	14,971	+
ORF12	*	137	14,094	14,971	+
ORF12	*	117	14,265	14,971	+
ORF12	*	88	14,394	14,971	+
ORF12	*	110	14,461	14,971	+
ORF12	*	167	14,522	14,971	+
ORF12	*	123	14,607	14,971	+
ORF12	Long	316	14,671	14,971	+
ORF12	Canonic	414	14,715	14,971	+
ORF14	*	26	18,229	20,385	+
ORF14	*	27	18,435	20,385	+
ORF14	Long	56	18,607	20,385	+
ORF14	Long	65	18,877	20,385	+
ORF14	Long	55	19,007	20,385	+
ORF14	Long	189	19,028	20,385	+
ORF14	Long	61	19,091	20,385	+
ORF14	Long	77	19,172	20,385	+
ORF14	Long	131	19,206	20,385	+
ORF14	Long	58	19,252	20,385	+
ORF14	Long	75	19,316	20,385	+
ORF14	Long	83	19,348	20,385	+
ORF14	Long	110	19,376	20,385	+
ORF14	Long	102	19,409	20,385	+
ORF14	*	50	19,420	20,385	+
ORF14	Long	82	19,530	20,385	+
ORF14	Long	661	19,583	20,385	+
ORF14	Long	1,403	19,640	20,385	+
ORF14	Canonic	1,985	19,661	20,385	+
ORF14	Short	602	19,745	20,385	+
ORF14	Short	507	19,876	20,385	+
ORF14	Short	360	19,940	20,385	+
ORF14	Short	150	19,975	20,385	+
ORF14	Short	529	20,097	20,385	+
ORF14	Short	461	20,123	20,385	+
ORF15	*	1,062	20,383	20,916	-
ORF15	Canonic	4,652	20,383	20,838	-
ORF15	*	423	20,383	21,107	-
ORF15	Long	1,988	20,383	20,934	-
ORF15	*	668	20,383	20,958	-
ORF17	*	5	22,942	23,631	-
ORF17	Canonic	35	23,010	23,631	-
ORF17	Long	32	23,010	23,724	-
ORF18	Canonic	4,256	24,413	24,630	-
ORF18	Long	413	24,413	24,673	-
ORF18	*	74	24,413	24,899	-
ORF18	Long	296	24,413	24,748	-
ORF18	Long	642	24,413	24,888	-
ORF18	*	41	24,413	25,628	-
ORF18	*	119	24,413	25,226	-
ORF18	*	53	24,413	25,388	-
ORF18	*	75	24,413	24,935	-
ORF18	*	56	24,413	24,986	-
ORF18	*	72	24,413	25,666	-
ORF19	Long	41	26,435	27,784	+
ORF19	Long	114	26,566	27,784	+
ORF19	Long	72	27,086	27,784	+
ORF19	Long	91	27,258	27,784	+
ORF19	Long	73	27,367	27,784	+
ORF19	Canonic	134	27,533	27,784	+
ORF20	Short	335	27,868	28,089	-
ORF20	Canonic	591	27,868	28,242	-
ORF20	*	113	27,868	28,745	-
ORF20	*	70	27,868	28,812	-
ORF20	*	146	27,868	28,347	-
ORF20	*	67	27,868	28,620	-
ORF22	*	71	31,489	31,795	-
ORF22	*	112	31,489	32,535	-
ORF22	*	56	31,489	32,263	-
ORF22	*	70	31,489	32,389	-
ORF22	*	141	31,489	32,017	-
ORF22	*	121	31,489	32,221	-
ORF22	Short	231	31,489	31,851	-
ORF22	*	152	31,489	31,958	-
ORF22	Canonic	348	31,489	32,808	-
ORF22	*	51	31,489	32,686	-
ORF22	*	44	31,489	32,738	-
ORF22	Long	217	31,489	32,829	-
ORF23	Long	64	34,837	36,380	+
ORF23	Long	93	35,171	36,380	+
ORF23	Long	34	35,307	36,380	+
ORF23	Long	67	35,460	36,380	+
ORF23	Long	52	35,577	36,380	+
ORF23	Long	85	35,754	36,380	+
ORF23	Canonic	751	35,814	36,380	+
ORF23	Short	74	36,027	36,380	+
ORF23	Short	144	36,080	36,380	+
ORF23	Short	142	36,200	36,380	+
ORF24	Long	16	42,194	46,890	+
ORF24	Long	4	43,754	46,890	+
ORF24	Long	37	44,894	46,890	+
ORF24	Long	40	44,990	46,890	+
ORF24	Long	73	45,197	46,890	+
ORF24	Canonic	425	45,483	46,890	+
ORF24	Short	56	45,800	46,890	+
ORF24	Short	46	45,876	46,890	+
ORF24	Short	60	45,920	46,890	+
ORF24	Short	84	46,066	46,890	+
ORF25	*	865	46,895	47,117	-
ORF25	*	287	46,895	47,174	-
ORF29	*	37	50,933	51,693	+
ORF29	*	30	50,980	51,693	+
ORF29	*	36	51,029	51,693	+
ORF29	*	29	51,073	51,693	+
ORF29	*	50	51,308	51,693	+
ORF29	*	205	51,425	51,693	+
ORF30	Short	83	51,486	51,950	-
ORF30	Short	41	51,486	52,022	-
ORF30	Canonic	114	51,486	52,259	-
ORF30	Long	50	51,486	52,618	-
ORF31	*	24	57,191	59,182	+
ORF31	*	106	57,817	59,182	+
ORF31	*	121	58,143	59,182	+
ORF31	*	65	58,207	59,182	+
ORF31	*	88	58,228	59,182	+
ORF31	*	151	58,336	59,182	+
ORF31	*	78	58,359	59,182	+
ORF31	*	83	58,398	59,182	+
ORF31	*	67	58,423	59,182	+
ORF31	*	75	58,492	59,182	+
ORF31	*	125	58,534	59,182	+
ORF31	Long	224	58,605	59,182	+
ORF31	*	153	58,668	59,182	+
ORF31	*	187	58,707	59,182	+
ORF31	*	87	58,742	59,182	+
ORF31	Canonic	355	58,926	59,182	+
ORF31	Short	303	58,993	59,182	+
ORF33	*	17	61,608	64,402	+
ORF33	*	23	63,269	64,402	+
ORF33	*	5	63,642	64,402	+
ORF33	Long	95	63,733	64,402	+
ORF33	*	23	63,831	64,402	+
ORF33	Long	43	63,876	64,402	+
ORF33	Long	41	63,952	64,402	+
ORF33	Long	66	64,005	64,402	+
ORF33	Long	136	64,136	64,402	+
ORF33	Canonic	170	64,227	64,402	+
ORF33	Short	79	64,279	64,402	+
ORF34	*	460	64,580	65,093	+
ORF34	*	222	64,611	65,093	+
ORF34	Long	1,306	64,629	65,093	+
ORF34	Canonic	2,467	64,686	65,093	+
ORF34	Short	944	64,740	65,093	+
ORF34	*	345	64,800	65,093	+
ORF34	*	674	64,914	65,093	+
ORF34	*	500	64,969	65,093	+
ORF35	*	128	65,089	65,803	-
ORF35	*	119	65,089	65,879	-
ORF35	*	136	65,089	65,630	-
ORF35	*	83	65,089	65,733	-
ORF35	*	108	65,089	65,942	-
ORF35	*	102	65,089	66,007	-
ORF35	*	242	65,089	66,088	-
ORF35	*	208	65,089	66,123	-
ORF36	Short	60	67,167	67,484	-
ORF36	Short	53	67,167	67,426	-
ORF36	Short	33	67,167	68,273	-
ORF36	Canonic	67	67,167	68,860	-
ORF37	Long	12	69,068	69,696	-
ORF37	Long	17	69,068	69,663	-
ORF37	Canonic	18	69,068	69,574	-
ORF38	Long	50	70,166	71,034	+
ORF38	Long	141	70,249	71,034	+
ORF38	Long	81	70,424	71,034	+
ORF38	Long	93	70,507	71,034	+
ORF38	Canonic	377	70,672	71,034	+
ORF38	Short	99	70,750	71,034	+
ORF38	Short	334	70,837	71,034	+
ORF39	Long	61	72,055	73,833	+
ORF39	Long	37	72,675	73,833	+
ORF39	Long	113	72,820	73,833	+
ORF39	Long	64	73,227	73,833	+
ORF39	Canonic	271	73,393	73,833	+
ORF39	Short	256	73,470	73,833	+
ORF39	Short	102	73,626	73,833	+
ORF40	*	9	73,834	75,187	-
ORF40	*	8	73,834	74,915	-
ORF40	*	22	73,834	76,188	-
ORF40	*	7	73,834	75,742	-
ORF40	*	13	73,834	75,358	-
ORF40	*	18	74,614	75,187	-
ORF40	*	39	74,614	74,915	-
ORF40	*	26	74,614	76,188	-
ORF40	*	24	74,614	75,742	-
ORF40	*	30	74,614	75,358	-
ORF42	*	23	78,509	81,894	+
ORF42	*	25	78,636	81,894	+
ORF42	*	45	78,779	81,894	+
ORF42	*	44	79,161	81,894	+
ORF42	*	46	79,666	81,894	+
ORF42	*	102	79,748	81,894	+
ORF42	*	35	79,796	81,894	+
ORF42	*	49	79,844	81,894	+
ORF42	*	47	79,912	81,894	+
ORF42	*	118	79,946	81,894	+
ORF42	*	101	79,972	81,894	+
ORF42	*	94	80,118	81,894	+
ORF42	Canonic	1,744	80,246	81,894	+
ORF42	Short	1,347	80,267	81,894	+
ORF42	*	119	80,625	81,894	+
ORF42	*	103	80,720	81,894	+
ORF42	*	140	80,796	81,894	+
ORF42	*	87	80,818	81,894	+
ORF42	*	77	80,829	81,894	+
ORF42	*	138	80,841	81,894	+
ORF42	*	222	80,872	81,894	+
ORF42	*	156	80,927	81,894	+
ORF42	Short	331	81,008	81,894	+
ORF42	*	130	81,077	81,894	+
ORF42	*	254	81,174	81,894	+
ORF42	*	238	81,201	81,894	+
ORF42	*	218	81,333	81,894	+
ORF42	*	242	81,395	81,894	+
ORF42	Short	435	81,436	81,894	+
ORF42	Short	807	81,495	81,894	+
ORF42	Short	889	81,557	81,894	+
ORF43	*	183	82,085	83,096	+
ORF43	*	103	82,184	83,096	+
ORF43	*	85	82,299	83,096	+
ORF43	*	255	82,331	83,096	+
ORF43	*	206	82,467	83,096	+
ORF43	*	148	82,481	83,096	+
ORF43	*	274	82,590	83,096	+
ORF43	*	120	82,614	83,096	+
ORF43	*	188	82,757	83,096	+
ORF43	*	124	82,770	83,096	+
ORF43	Canonic	746	82,842	83,096	+
ORF43	Short	364	82,860	83,096	+
ORF47_44	Long	37	83,090	87,726	-
ORF47_44	Long	14	83,090	87,433	-
ORF47_44	Long	22	83,090	87,781	-
ORF47_44	Long	27	83,090	88,377	-
ORF47_44	Long	11	83,090	85,121	-
ORF47_44	Long	5	83,090	88,377	-
ORF47_44	Long	94	83,090	83,778	-
ORF47_44	Long	43	83,090	83,883	-
ORF47_44	Long	67	83,090	83,442	-
ORF47_44	Long	123	83,090	83,510	-
ORF47_44	Canonic	228	83,090	83,217	-
ORF47_44	Long	41	83,090	84,687	-
ORF47_44	Long	205	83,090	83,961	-
ORF47_44	Long	45	83,090	84,134	-
ORF46	Long	80	86,661	87,824	+
ORF46	*	65	86,901	87,824	+
ORF46	Canonic	200	87,043	87,824	+
ORF46	Short	125	87,171	87,824	+
ORF46	Short	137	87,291	87,824	+
ORF51	Canonic	284	92,786	93,028	+
ORF52	Canonic	2,020	93,031	93,295	-
ORF52	Long	450	93,031	93,365	-
ORF52	Long	410	93,031	93,471	-
ORF52	Long	298	93,031	93,402	-
ORF52	Long	369	93,031	93,446	-
ORF52	*	59	93,031	94,182	-
ORF52	*	103	93,031	94,227	-
ORF52	*	210	93,031	93,948	-
ORF52	*	210	93,031	93,998	-
ORF52	*	204	93,031	93,746	-
ORF52	*	207	93,031	93,785	-
ORF52	*	167	93,031	93,635	-
ORF52	Long	702	93,031	93,713	-
ORF52	*	75	93,031	94,295	-
ORF52	*	95	93,031	94,375	-
ORF52	*	158	93,031	94,412	-
ORF53	Long	3	94,861	98,004	+
ORF53	Long	56	95,968	98,004	+
ORF53	Long	11	96,106	98,004	+
ORF53	Canonic	901	96,454	98,004	+
ORF54	*	73	97,088	99,345	+
ORF54	*	76	97,130	99,345	+
ORF54	*	48	97,150	99,345	+
ORF54	*	60	97,230	99,345	+
ORF54	*	119	97,269	99,345	+
ORF54	*	48	97,299	99,345	+
ORF54	*	142	97,332	99,345	+
ORF54	*	97	97,456	99,345	+
ORF54	*	95	97,560	99,345	+
ORF54	*	100	97,616	99,345	+
ORF54	*	82	97,642	99,345	+
ORF54	*	115	97,818	99,345	+
ORF54	*	96	97,881	99,345	+
ORF54	*	216	98,035	99,345	+
ORF54	*	150	98,162	99,345	+
ORF54	*	240	98,225	99,345	+
ORF54	Canonic	2,331	98,261	99,345	+
ORF54	Short	1,120	98,304	99,345	+
ORF54	*	345	98,413	99,345	+
ORF54	*	292	98,700	99,345	+
ORF54	*	257	98,789	99,345	+
ORF54	Short	1,174	99,014	99,345	+
ORF54	Short	933	99,095	99,345	+
ORF54	Short	2,331	99,177	99,345	+
ORF54	Short	1,771	99,197	99,345	+
ORF57	Long	10	102,672	105,147	+
ORF57	Long	6	102,806	105,147	+
ORF57	Long	3	103,143	105,147	+
ORF57	Long	6	103,207	105,147	+
ORF57	Long	3	103,399	105,147	+
ORF57	Long	39	103,733	105,147	+
ORF57	Long	8	104,079	105,147	+
ORF57	Long	10	104,206	105,147	+
ORF57	Long	6	104,254	105,147	+
ORF57	Long	8	104,354	105,147	+
ORF57	Long	8	104,414	105,147	+
ORF57	Long	28	104,496	105,147	+
ORF57	Long	14	104,591	105,147	+
ORF57	Long	20	104,640	105,147	+
ORF57	Long	4	104,723	105,147	+
ORF57	Long	6	104,753	105,147	+
ORF57	Long	10	104,772	105,147	+
ORF57	Canonic	40	104,814	105,147	+
ORF57	Short	14	104,890	105,147	+
ORF57	Short	11	104,908	105,147	+
ORF58	Long	235	105,072	105,836	+
ORF58	Long	156	105,118	105,836	+
ORF58	Long	341	105,195	105,836	+
ORF58	Long	214	105,237	105,836	+
ORF58	Long	526	105,338	105,836	+
ORF58	Long	382	105,361	105,836	+
ORF58	Long	795	105,392	105,836	+
ORF58	Long	527	105,407	105,836	+
ORF58	Canonic	8,596	105,456	105,836	+
ORF58	Short	750	105,476	105,836	+
ORF58	Short	1,384	105,585	105,836	+
ORF59	*	777	105,829	106,204	-
ORF59	*	375	105,829	106,346	-
ORF59	*	449	105,829	106,404	-
ORF59	*	425	105,829	106,262	-
ORF59	*	275	105,829	106,303	-
ORF63	Long	100	110,319	110,868	-
ORF63	Canonic	132	110,319	110,616	-
ORF64	Canonic	20	113,821	115,010	-
ORF64	Long	13	113,821	117,667	-
ORF65	Canonic	96	121,617	122,451	+
ORF67	Canonic	837	124,283	124,550	-
ORF67	Long	802	124,283	124,602	-
ORF67	Long	766	124,283	124,678	-
ORF67	*	267	124,283	124,701	-
ORF67	*	205	124,283	125,161	-
ORF67	*	164	124,283	124,922	-
ORF67	*	209	124,283	125,055	-
ORF67	*	136	124,283	124,809	-
ORF67	*	218	124,283	124,877	-
ORF67	*	205	124,283	124,739	-
ORF67	*	105	124,283	124,754	-
ORF70	*	39	127,863	128,944	+
ORF70	*	62	128,083	128,944	+
ORF70	*	94	128,416	128,944	+
ORF70	Long	160	128,772	128,944	+
ORF70	Canonic	173	128,788	128,944	+
ORF71	*	12	129,175	131,601	+
ORF71	*	25	129,474	131,601	+
ORF71	Long	144	130,020	131,601	+
ORF71	*	10	130,113	131,601	+
ORF71	Long	37	130,201	131,601	+
ORF71	Long	106	130,853	131,601	+
ORF71	Long	119	130,929	131,601	+
ORF71	Long	243	131,035	131,601	+
ORF71	Canonic	572	131,126	131,601	+
ORF73	Long	45	133,013	134,249	+
ORF73	Long	53	133,106	134,249	+
ORF73	Long	98	133,433	134,249	+
ORF73	Canonic	242	133,665	134,249	+
ORF73	Short	110	133,714	134,249	+
ORF73	Short	117	133,907	134,249	+
ORF73	Short	87	133,945	134,249	+
ORF67.1	*	205	137,999	138,877	+
ORF67.1	*	209	138,105	138,877	+
ORF67.1	*	164	138,238	138,877	+
ORF67.1	*	218	138,283	138,877	+
ORF67.1	*	137	138,351	138,877	+
ORF67.1	*	132	138,406	138,877	+
ORF67.1	*	179	138,421	138,877	+
ORF67.1	*	267	138,459	138,877	+
ORF67.1	Long	766	138,482	138,877	+
ORF67.1	Long	804	138,558	138,877	+
ORF67.1	Canonic	838	138,610	138,877	+
ORF65.1	Canonic	96	140,709	141,543	-
ORF64.1	Long	13	145,493	149,339	+
ORF64.1	Canonic	20	148,150	149,339	+

## Sheet: E. non-coding
Transcript	Type	Count	Start/Stop	Start/Stop	Length	Strand
ncs2	lncRNA	3	2,000	3,584	1,585	-
ncs2	lncRNA	19	2,000	2,672	673	-
ncs2	lncRNA	57	2,000	2,540	541	-
nct5	lncRNA	235	4,391	4,642	252	-
nct5	lncRNA	126	4,391	4,605	215	-
nct8	sncRNA	128	10,875	11,067	193	+
nct9	lncRNA	214	11,064	11,410	347	-
nct9	lncRNA	148	11,064	11,356	293	-
nct9	sncRNA	62	11,064	11,214	151	-
as9	Antisense	3	14,922	15,699	778	-
ncs13	lncRNA	151	15,083	16,341	1,259	+
ncs13	lncRNA	215	15,083	15,940	858	+
ncs13	lncRNA	606	15,083	15,898	816	+
ncs13	lncRNA	175	15,083	15,775	693	+
ncs13	lncRNA	74	15,083	15,712	630	+
ncs13	lncRNA	38	15,083	15,670	588	+
ncs13	lncRNA	121	15,234	16,341	1,108	+
ncs13	lncRNA	101	15,234	15,940	707	+
ncs13	lncRNA	276	15,234	15,898	665	+
ncs13	lncRNA	69	15,234	15,775	542	+
ncs13	lncRNA	20	15,234	15,712	479	+
ncs13	lncRNA	24	15,234	15,670	437	+
nct13	lncRNA	5	15,563	16,341	779	+
nct13	lncRNA	9	15,563	15,940	378	+
nct13	lncRNA	16	15,563	15,898	336	+
nct13	lncRNA	5	15,647	16,341	695	+
as14	Antisense	12	20,396	20,968	573	+
as14	Antisense	10	23,079	24,419	1,341	+
as14	Antisense	15	23,099	24,419	1,321	+
as14	Antisense	3	23,686	24,419	734	+
as14	Antisense	20	23,857	24,419	563	+
as18	Antisense	15	34,959	35,525	567	-
as18	Antisense	7	34,959	35,409	451	-
as19	Antisense	9	41,728	43,519	1,792	-
as19	Antisense	4	42,724	43,519	796	-
nct24	sncRNA	92	46,768	46,890	123	+
ncs29	lncRNA	7	50,573	50,923	351	+
as23	Antisense	6	52,040	55,141	3,102	+
as24	Antisense	77	58,078	59,824	1,747	-
as24	Antisense	5	58,078	61,815	3,738	-
as24	Antisense	26	58,078	61,257	3,180	-
as24	Antisense	14	58,078	61,090	3,013	-
as24	Antisense	3	58,078	63,941	5,864	-
as27	Antisense	10	61,214	61,815	602	-
as31	Antisense	57	64,367	65,066	700	-
as35	Antisense	3	66,315	67,175	861	+
nct37	lncRNA	35	69,068	69,363	296	-
nct37	sncRNA	16	69,068	69,244	177	-
nct38	sncRNA	227	70,903	71,034	132	+
CTO-S	lncRNA	10,677	73,834	74,183	349	-
CTO-L	lncRNA	30	73,834	74,257	423	-
CTO-S-AS-	lncRNA	12	73,856	74,182	326	-
as43	Antisense	5	81,889	82,583	695	-
nct43	sncRNA	241	82,900	83,096	197	+
as49-48	Antisense	8	89,245	90,427	1,183	-
ncs53	lncRNA	17	94,358	95,914	1,557	+
ncs54	lncRNA	26	96,796	98,004	1,209	+
ncs54	lncRNA	24	96,842	98,004	1,163	+
ncs54	lncRNA	123	96,925	98,004	1,080	+
ncs54	lncRNA	16	96,948	98,004	1,057	+
ncs54	lncRNA	14	97,020	98,004	985	+
ncs54	lncRNA	20	97,088	98,004	917	+
ncs54	lncRNA	17	97,130	98,004	875	+
ncs54	lncRNA	11	97,150	98,004	855	+
ncs54	lncRNA	21	97,230	98,004	775	+
ncs54	lncRNA	25	97,269	98,004	736	+
ncs54	lncRNA	18	97,299	98,004	706	+
ncs54	lncRNA	35	97,332	98,004	673	+
ncs54	lncRNA	16	97,456	98,004	549	+
ncs54	lncRNA	22	97,560	98,004	445	+
ncs54	lncRNA	33	97,616	98,004	389	+
ncs54	lncRNA	16	97,642	98,004	363	+
ncs54	sncRNA	23	97,818	98,004	187	+
ncs54	sncRNA	39	97,881	98,004	124	+
as54	Antisense	81	99,190	99,332	143	-
nct55	sncRNA	51	99,349	99,510	162	-
nct57	lncRNA	3	103,143	103,368	226	+
nct57	sncRNA	42	105,006	105,147	142	+
ncs63	lncRNA	3	111,297	112,623	1,327	-
ncs63	lncRNA	13	111,297	112,211	915	-
ncs63	lncRNA	26	111,297	112,033	737	-
ncs63	lncRNA	7	111,333	112,623	1,291	-
ncs63	lncRNA	6	111,333	112,211	879	-
ncs63	lncRNA	24	111,333	112,033	701	-
ncs63	lncRNA	4	111,464	112,211	748	-
ncs63	lncRNA	4	111,500	112,033	534	-
ncs63	lncRNA	3	111,746	112,623	878	-
ncs63	lncRNA	6	111,746	112,211	466	-
ncs63	lncRNA	5	111,746	112,144	399	-
ncs63	lncRNA	38	111,746	112,033	288	-
ncs63	lncRNA	4	111,833	112,211	379	-
ncs63	lncRNA	5	111,833	112,033	201	-
ncs63	lncRNA	10	111,877	112,623	747	-
ncs63	lncRNA	6	111,877	112,211	335	-
ncs63	lncRNA	5	111,877	112,144	268	-
ncs63	sncRNA	8	111,877	112,033	157	-
NOIR	lncRNA	72	118,878	119,857	979	+
NOIR	lncRNA	28	118,878	119,857	979	+
NOIR	lncRNA	5	118,878	119,749	871	+
NOIR	lncRNA	22	118,878	119,749	871	+
NOIR	lncRNA	14	118,935	119,857	922	+
NOIR	lncRNA	3	118,935	119,857	922	+
NOIR	lncRNA	12	119,050	119,857	807	+
NOIR	lncRNA	3	119,050	119,857	807	+
nct65	lncRNA	186	121,788	122,451	664	+
nct65	lncRNA	77	122,015	122,451	437	+
nct65	lncRNA	287	122,066	122,451	386	+
nct65	lncRNA	100	122,104	122,451	348	+
nct65	sncRNA	207	122,258	122,451	194	+
nct67	sncRNA	1,000	124,283	124,473	191	-
as70	Antisense	21	127,858	128,110	253	-
as70	Antisense	7	127,858	128,030	173	-
as72	Antisense	17	131,771	132,362	592	-
as72	Antisense	7	132,040	132,362	323	-
as74	Antisense	18	134,210	135,508	1,299	-
nct67	sncRNA	1,000	138,687	138,877	191	+
ncss65.1	lncRNA	207	140,709	140,902	1,193	-
nct65.1	lncRNA	77	140,709	141,145	1.436	-
nct65.1	lncRNA	186	140,709	141,372	1.663	-
nct65.1	lncRNA	100	140,709	141,056	1.347	-
nct65.1	lncRNA	287	140,709	141,094	1.385	-
NOIR	lncRNA	72	143,303	144,282	979	-
NOIR	lncRNA	33	143,303	144,282	979	-
NOIR	lncRNA	15	143,303	144,225	922	-
NOIR	lncRNA	12	143,303	144,110	807	-
NOIR	lncRNA	3	143,303	144,225	922	-
NOIR	lncRNA	3	143,303	144,110	807	-
NOIR	lncRNA	6	143,411	144,282	871	-
NOIR	lncRNA	23	143,411	144,282	871	-

## Sheet: F. Manually annotated
Transcript	Start/Stop	Start/Stop	Strand	Count
ORF4-5-6-7-8	3.296	11.072	+	1
ORF6-7-8-9-10-11	5.397	13.517	+	1
ORF12-11-10-9-8-7-6	6,010	14.927	-	1
ORF13-12-11-10-9	11.121	18.207	-	1
ORF15-16	20.457	23.712	+	1
ORF17-18-19-20	22.945	29.321	-	1
ORF25-262-27-28-29	47.036	51.686	+	1
ORF27-28-29-30-31	48.073	59.182	+	1
ORF30-31-32-33	51.567	62.822	-	1
ORF31-32-33-34	52.454	65.086	+	1
ORF40-41-42-43-44	73,890	85.925	-	1
ORF40-41-42	74.435	81.892	+	1
ORF44-48-49-50	83,090	92,950	-	1
ORF46-48-49-50	85.485	93.028	+	1
ORF48-49-50-51-52-53-54	87.844	99.343	+	1
ORF51-50-49-48	87.845	93.028	-	1
ORF53-54-55-56-57-58	94.358	105.827	+	1
ORF65-66	120.997	123,600	+	1
ORF67-68-69-70-71-72-73-74	124.289	137.215	-	1
ORF67-68-69-70	124,330	128.926	+	1
ORF65	140,710	142,287	-	1
ORF65	120,936	122,451	+	1
