# Supplementary material for: Hybrid Sequencing Reveals Novel Features in the Transcriptomic Organization of Equid Alphaherpesvirus 1
Source: Preprints.org preprint supplement (doi:10.20944/preprints202206.0219.v1), 2022-06-15
Supplement: Supplementary file 3 [file Supplementary Table S3.xlsx]

## Sheet: fORF
Gene	Start/Stop	Start/Stop	Putativ peptide length	Fickett_score	pI	ORF_integrity	coding_probability	Coding potential
ORF65	140,709	142,158	294	0.43385	5.08648681641	1	0.999999	coding
ORF65	140,709	142,158	325	0.44463	5.33355712891	1	1	coding
ORF54, ORF55, ORF56, ORF57, ORF58	96,454	105,836	409	0.43466	9.20306396484	1	1	coding
ORF54, ORF55, ORF56, ORF57, ORF58	96,454	105,836	412	0.43148	9.03082275391	1	1	coding
ORF54, ORF55, ORF56, ORF57, ORF58	96,454	105,836	610	0.43441	5.75042724609	1	1	coding
ORF54, ORF55, ORF56, ORF57, ORF58	96,454	105,836	428	0.45781	4.99127197266	1	1	coding
ORF54, ORF55, ORF56, ORF57, ORF58	96,454	105,836	187	0.42219	8.99298095703	1	0.986743	coding
ORF54, ORF55, ORF56, ORF57, ORF58	96,454	105,836	409	0.42478	9.20306396484	1	1	coding
ORF54, ORF55, ORF56, ORF57, ORF58	96,454	105,836	409	0.42683	9.20306396484	1	1	coding
ORF44	83,090	92,179	317	0.47137	6.15924072266	1	1	coding
ORF44	83,090	92,062	317	0.48736	6.15924072266	1	1	coding
ORF55, ORF56, ORF57, ORF58	98,035	105,836	69	0.45367	11.785949707	1	0.197043	noncoding
ORF44	83,090	88,988	735	0.45128	8.39459228516	1	1	coding
ORF44	83,090	88,377	528	0.44758	7.24688720703	1	1	coding
ORF7, ORF8	6,149	11,067	246	0.46903	7.04852294922	1	0.999926	coding
ORF36, ORF37, ORF38	66,315	71,034	353	0.45407	6.66693115234	1	1	coding
ORF44	83,090	87,781	317	0.38724	6.15924072266	1	0.999997	coding
ORF44	83,090	87,726	317	0.38724	6.15924072266	1	0.999997	coding
ORF7, ORF8	6,466	11,067	110	0.47218	6.25921630859	1	0.700817	coding
ORF7, ORF8	6,466	11,067	246	0.47723	7.04852294922	1	0.999931	coding
ORF36, ORF37, ORF38	66,576	71,034	353	0.45924	6.66693115234	1	1	coding
ORF36, ORF37, ORF38	66,600	71,034	353	0.45924	6.66693115234	1	1	coding
ORF36, ORF37, ORF38	66,701	71,034	353	0.46232	6.66693115234	1	1	coding
ORF12, ORF11, ORF10, ORF9	11,064	15,032	107	0.40763	7.76263427734	1	0.426337	noncoding
ORF8	7,110	11,067	246	0.45455	7.04852294922	1	0.99991	coding
ORF11, ORF10, ORF9	11,064	14,907	107	0.44438	7.76263427734	1	0.567297	coding
ORF8	7,689	11,067	246	0.47661	7.04852294922	1	0.999931	coding
ORF8	7,689	11,067	110	0.44803	6.25921630859	1	0.68248	coding
ORF58	102,672	105,836	422	0.46277	5.78155517578	1	1	coding
ORF54	96,454	99,345	752	0.43611	6.08367919922	1	1	coding
ORF58	103,143	105,836	271	0.44352	5.19830322266	1	0.999995	coding
ORF37, ORF38	68,373	71,034	353	0.45099	6.66693115234	1	1	coding
ORF10, ORF9	11,064	13,390	107	0.43916	7.76263427734	1	0.549021	coding
ORF58	103,561	105,836	134	0.44173	4.52886962891	1	0.966234	coding
ORF58	103,733	105,836	240	0.41939	4.20074462891	1	0.999976	coding
ORF44	83,090	85,121	317	0.45349	6.15924072266	1	0.999999	coding
ORF58	104,206	105,836	106	0.39672	3.86553955078	1	0.814462	coding
ORF58	104,226	105,836	106	0.39672	3.86553955078	1	0.814462	coding
ORF58	104,254	105,836	106	0.40447	3.86553955078	1	0.833669	coding
ORF53	96,454	98,004	312	0.47099	7.06890869141	-1	0.653458	coding
ORF53	96,454	98,004	312	0.44838	7.06890869141	-1	0.603069	coding
ORF55, ORF56, ORF57, ORF58	97,088	105,836	374	0.42463	9.48468017578	1	0.999999	coding
ORF55, ORF56, ORF57, ORF58	97,150	105,836	374	0.42683	9.48468017578	1	0.999999	coding
ORF55, ORF56, ORF57, ORF58	97,560	105,836	179	0.38114	9.62481689453	1	0.927744	coding
ORF55, ORF56, ORF57, ORF58	97,616	105,836	179	0.40771	9.62481689453	1	0.963944	coding
ORF55, ORF56, ORF57, ORF58	97,881	105,836	134	0.39729	9.65997314453	1	0.690083	coding
ORF54, ORF55, ORF56, ORF57, ORF58	96,454	105,836	81	0.4616	11.3980102539	1	0.372185	noncoding
ORF44	83,090	89,226	735	0.46777	8.39459228516	1	1	coding
ORF54	96,454	99,345	752	0.47182	6.08367919922	1	1	coding
ORF58	103,733	105,836	42	0.46231	12.0806274414	1	0.0715126	noncoding
ORF44	83,090	84,687	417	0.44727	6.31243896484	1	1	coding
ORF58	105,006	105,836	109	0.50813	3.77252197266	1	0.720543	coding
ORF65	121,002	122,451	325	0.44463	5.33355712891	1	1	coding
ORF65	121,002	122,451	294	0.43385	5.08648681641	1	0.999999	coding
ORF65	140,709	142,158	294	0.42208	5.08648681641	1	0.999998	coding
ORF65	140,709	142,158	294	0.44463	5.08648681641	1	0.999999	coding
ORF44	83,090	89,226	455	0.38891	6.75433349609	1	1	coding
ORF65	120,072	122,451	325	0.42059	5.33355712891	1	1	coding
ORF65	120,072	122,451	294	0.38469	5.08648681641	1	0.999995	coding
ORF65	140,709	143,088	325	0.42059	5.33355712891	1	1	coding
ORF65	140,709	143,088	294	0.38469	5.08648681641	1	0.999995	coding
ORF65	140,709	142,778	325	0.4206	5.33355712891	1	1	coding
ORF65	120,382	122,451	294	0.39766	5.08648681641	1	0.999997	coding
ORF65	140,709	142,778	294	0.39766	5.08648681641	1	0.999997	coding
ORF54, ORF55, ORF56, ORF57, ORF58	96,454	105,836	478	0.44214	4.97637939453	1	1	coding
ORF54, ORF55, ORF56, ORF57, ORF58	96,454	105,836	412	0.41769	9.03082275391	1	1	coding
ORF54, ORF55, ORF56, ORF57, ORF58	96,454	105,836	752	0.28426	6.08367919922	1	1	coding
ORF54, ORF55, ORF56, ORF57, ORF58	96,454	105,836	752	0.313	6.08367919922	1	1	coding
ORF44	83,090	90,427	317	0.45475	6.15924072266	1	0.999999	coding
ORF7, ORF8	6,149	11,067	110	0.32943	6.25921630859	1	0.287846	noncoding
ORF12, ORF11, ORF10, ORF9	11,064	15,032	327	0.36548	5.20489501953	1	0.999998	coding
ORF11, ORF10, ORF9	11,064	14,907	327	0.39312	5.20489501953	1	1	coding
ORF58	102,740	105,836	271	0.45872	5.19830322266	1	0.999995	coding
ORF58	102,806	105,836	271	0.45872	5.19830322266	1	0.999995	coding
ORF58	103,143	105,836	66	0.4918	8.73956298828	1	0.199141	noncoding
ORF58	103,143	105,836	478	0.45521	4.97637939453	1	1	coding
ORF58	103,207	105,836	184	0.44856	4.71331787109	1	0.998754	coding
ORF58	103,229	105,836	55	0.49677	11.9462280273	1	0.301712	noncoding
ORF58	104,079	105,836	169	0.40142	3.75091552734	1	0.997344	coding
ORF58	104,206	105,836	84	0.41365	11.0468139648	1	0.200077	noncoding
ORF58	104,354	105,836	62	0.46003	11.9474487305	1	0.163865	noncoding
ORF55, ORF56, ORF57, ORF58	97,269	105,836	315	0.42683	9.54205322266	1	0.999985	coding
ORF55, ORF56, ORF57, ORF58	97,299	105,836	315	0.42159	9.54205322266	1	0.999981	coding
ORF55, ORF56, ORF57, ORF58	97,332	105,836	315	0.42759	9.54205322266	1	0.999986	coding
ORF55, ORF56, ORF57, ORF58	97,456	105,836	179	0.41612	9.62481689453	1	0.971601	coding
ORF44	83,090	88,988	455	0.38648	6.75433349609	1	1	coding
ORF65	140,709	143,622	294	0.37021	5.08648681641	1	0.999992	coding
ORF65	140,709	143,601	325	0.41532	5.33355712891	1	1	coding
ORF65	120,382	122,451	325	0.4206	5.33355712891	1	1	coding

## Sheet: nonc_coding
Name	Start/Stop	Start/Stop	Putative peptide_length	Fickett_score	pI	ORF_integrity	coding_probability	Coding/noncoding
ncs2	2,000	3,584	187	0.33343	9.809875488	-1	0.179697	noncoding
ncs2	2,000	2,672	187	0.39042	9.809875488	-1	0.213398	noncoding
ncs2	2,000	2,540	147	0.4118	8.806091309	-1	0.138176	noncoding
nct5	4,391	4,642	27	0.38438	10.76300049	1	0.0142667	noncoding
nct5	4,391	4,605	27	0.38163	10.76300049	1	0.0140703	noncoding
nct8	10,875	11,067	0	0.42423	0	-1	0.0148089	noncoding
nct9	11,064	11,410	19	0.4294	8.253723145	1	0.00600029	noncoding
nct9	11,064	11,356	19	0.46963	8.253723145	1	0.00858832	noncoding
nct9	11,064	11,214	19	0.35141	8.253723145	1	0.0040648	noncoding
ncs13	15,083	16,341	341	0.48373	4.280944824	-1	0.922729	coding
ncs13	15,083	15,940	208	0.48982	4.116516113	-1	0.490062	noncoding
ncs13	15,083	15,898	194	0.4641	4.349304199	-1	0.353145	noncoding
ncs13	15,083	15,775	153	0.44832	4.596740723	-1	0.16116	noncoding
ncs13	15,083	15,712	132	0.44584	5.250915527	-1	0.0943846	noncoding
ncs13	15,083	15,670	118	0.41897	9.653381348	-1	0.139459	noncoding
ncs13	15,234	16,341	341	0.4663	4.280944824	-1	0.912464	coding
ncs13	15,234	15,940	208	0.47605	4.116516113	-1	0.478299	noncoding
ncs13	15,234	15,898	194	0.5074	4.349304199	-1	0.364374	noncoding
ncs13	15,234	15,775	153	0.46589	4.596740723	-1	0.183764	noncoding
ncs13	15,234	15,712	132	0.44658	5.250915527	-1	0.0948412	noncoding
ncs13	15,234	15,670	118	0.42128	9.653381348	-1	0.139579	noncoding
nct13	15,563	16,341	206	0.44562	4.011047363	-1	0.399508	noncoding
nct13	15,563	15,940	73	0.45672	3.367492676	-1	0.0692367	noncoding
nct13	15,563	15,898	59	0.46858	3.629333496	-1	0.0532284	noncoding
nct13	15,647	16,341	206	0.43463	4.011047363	-1	0.3582	noncoding
nct24	46,768	46,890	1	0.47353	5.274963379	-1	0.0101728	noncoding
ncs29	50,573	50,923	102	0.42505	9.446350098	-1	0.113717	noncoding
nct37	69,068	69,363	0	0.42727	0	-1	0.0172278	noncoding
nct37	69,068	69,244	0	0.45884	0	-1	0.0718755	noncoding
nct38	70,903	71,034	7	0.44239	5.274963379	1	0.00320284	noncoding
nct43	82,900	83,096	11	0.44233	5.272521973	-1	0.0112784	noncoding
ncs53	94,358	95,914	508	0.45643	8.870178223	-1	0.945208	coding
ncs54	96,796	98,004	312	0.46844	7.068908691	-1	0.648694	coding
ncs54	96,842	98,004	312	0.46844	7.068908691	-1	0.648694	coding
ncs54	96,925	98,004	312	0.46879	7.068908691	-1	0.649364	coding
ncs54	96,948	98,004	312	0.46074	7.068908691	-1	0.632739	coding
ncs54	97,020	98,004	312	0.46761	7.068908691	-1	0.647084	coding
ncs54	97,088	98,004	277	0.4611	8.453063965	-1	0.5	coding
ncs54	97,130	98,004	277	0.46391	8.453063965	-1	0.5	coding
ncs54	97,150	98,004	277	0.45307	8.453063965	-1	0.474795	noncoding
ncs54	97,230	98,004	218	0.45679	7.662902832	-1	0.276954	noncoding
ncs54	97,269	98,004	218	0.45431	7.662902832	-1	0.2737	noncoding
ncs54	97,299	98,004	218	0.45059	7.662902832	-1	0.268808	noncoding
ncs54	97,332	98,004	218	0.45474	7.662902832	-1	0.274265	noncoding
ncs54	97,456	98,004	82	0.4566	5.558654785	-1	0.0405907	noncoding
ncs54	97,560	98,004	82	0.45086	5.558654785	-1	0.0396521	noncoding
ncs54	97,616	98,004	82	0.44253	5.558654785	-1	0.038262	noncoding
ncs54	97,642	98,004	82	0.42608	5.558654785	-1	0.0358381	noncoding
ncs54	97,818	98,004	37	0.42827	4.425964355	-1	0.0182565	noncoding
ncs54	97,881	98,004	37	0.44955	4.425964355	-1	0.0217444	noncoding
nct55	99,349	99,510	21	0.41239	9.035583496	-1	0.0473696	noncoding
nct57	103,143	103,368	59	0.44833	8.739929199	-1	0.0526862	noncoding
nct57	105,006	105,147	26	0.35545	5.750061035	-1	0.0212839	noncoding
ncs63	111,297	112,623	229	0.38844	4.110534668	-1	0.299629	noncoding
ncs63	111,297	112,211	229	0.42647	4.110534668	-1	0.425374	noncoding
ncs63	111,297	112,033	229	0.45128	4.110534668	-1	0.518372	coding
ncs63	111,333	112,623	217	0.38596	4.257995605	-1	0.247523	noncoding
ncs63	111,333	112,211	217	0.42852	4.257995605	-1	0.361763	noncoding
ncs63	111,333	112,033	217	0.45933	4.257995605	-1	0.464992	noncoding
ncs63	111,464	112,211	174	0.40826	4.27142334	-1	0.164217	noncoding
ncs63	111,500	112,033	162	0.45781	4.196472168	-1	0.231005	noncoding
ncs63	111,746	112,623	92	0.3229	10.95098877	1	0.0900604	noncoding
ncs63	111,746	112,211	92	0.34627	10.95098877	1	0.113698	noncoding
ncs63	111,746	112,144	92	0.36668	10.95098877	1	0.143829	noncoding
ncs63	111,746	112,033	80	0.41699	4.428527832	-1	0.0362091	noncoding
ncs63	111,833	112,211	74	0.40484	10.5178833	-1	0.140682	noncoding
ncs63	111,833	112,033	51	0.37482	6.516296387	-1	0.0304769	noncoding
ncs63	111,877	112,623	60	0.35408	10.79400635	-1	0.16932	noncoding
ncs63	111,877	112,211	60	0.40953	10.79400635	-1	0.141301	noncoding
ncs63	111,877	112,144	60	0.36993	10.79400635	-1	0.160428	noncoding
ncs63	111,877	112,033	36	0.37105	5.424987793	-1	0.0187432	noncoding
nct65	121,788	122,451	55	0.39849	10.29510498	1	0.0498118	noncoding
nct65	122,015	122,451	55	0.4698	10.29510498	1	0.147176	noncoding
nct65	122,066	122,451	55	0.46651	10.29510498	1	0.138396	noncoding
nct65	122,104	122,451	55	0.46163	10.29510498	1	0.1265	noncoding
nct65	122,258	122,451	31	0.38665	10.83441162	1	0.0172679	noncoding
nct67	124,283	124,473	0	0.44106	0	-1	0.033537	noncoding
nct67	138,687	138,877	0	0.44106	0	-1	0.033537	noncoding
ncss65.1	140,709	140,902	31	0.38665	10.8344116211	1	0.0172679	noncoding
nct65.1	140,709	141,145	55	0.4698	10.2951049805	1	0.147176	noncoding
nct65.1	140,709	141,372	55	0.39849	10.2951049805	1	0.0498118	noncoding
nct65.1	140,709	141,056	55	0.46163	10.2951049805	1	0.1265	noncoding
nct65.1	140,709	141,094	55	0.46651	10.2951049805	1	0.138396	noncoding
NOIR	118,878	119,857	52	0.33129	10.9249	1	0.0293447	noncoding
NOIR	143,303	144,282	52	0.33129	10.9249	1	0.0293447	noncoding
NOIR	118,878	119,857	50	0.35575	10.93	1	0.0304361	noncoding
NOIR	143,303	144,282	50	0.35575	10.93	1	0.0304361	noncoding
NOIR	118,935	119,857	52	0.33381	10.9249	1	0.0295791	noncoding
NOIR	143,303	144,225	52	0.33381	10.9249	1	0.0295791	noncoding
NOIR	118,878	119,749	50	0.35984	10.93	1	0.0311372	noncoding
NOIR	143,411	144,282	50	0.35984	10.93	1	0.0311372	noncoding
NOIR	118,878	119,749	52	0.32705	10.9249	1	0.0290041	noncoding
NOIR	143,411	144,282	52	0.32705	10.9249	1	0.0290041	noncoding
NOIR	119,050	119,857	40	0.33578	11.2509	1	0.0208881	noncoding
NOIR	143,303	144,110	40	0.33578	11.2509	1	0.0208881	noncoding
NOIR	118,935	119,857	50	0.37625	10.93	1	0.0347559	noncoding
NOIR	143,303	144,225	50	0.37625	10.93	1	0.0347559	noncoding
NOIR	119,050	119,857	50	0.38624	10.8184	1	0.0375591	noncoding
NOIR	143,303	144,110	50	0.38624	10.8184	1	0.0375591	noncoding

## Sheet: antisense
Name	Start/Stop	Start/Stop	Putativ peptide_length	Fickett_score	pI	ORF_integrity	coding_probability	Coding/noncoding
as24	58,078	59,824	107	0.38923	11.95355225	1	0.225304	noncoding
as31	64,367	65,066	78	0.42817	11.53192139	1	0.184387	noncoding
as54	99,190	99,332	12	0.37552	6.69354248	1	1.62473E-05	noncoding
as24	58,078	61,815	145	0.34483	11.45904541	1	0.376306	noncoding
as24	58,078	61,257	107	0.34421	11.95355225	1	0.125175	noncoding
as23	52,040	55,141	93	0.44606	9.887023926	1	0.42949	noncoding
as24	58,078	61,090	107	0.34483	11.95355225	1	0.126076	noncoding
as19	41,728	43,519	116	0.42464	10.20758057	1	0.612629	potential coding
as14	23,079	24,419	166	0.43323	7.733215332	1	0.974794	potential coding
as14	23,099	24,419	166	0.42819	7.733215332	1	0.972095	potential coding
as74	134,210	135,508	110	0.42943	9.352600098	1	0.56217	potential coding
as49-48	89,245	90,427	137	0.36989	9.292785645	1	0.595788	potential coding
as43	81,889	82,583	99	0.36188	11.47650146	1	0.150142	noncoding
as27	61,214	61,815	145	0.37039	11.45904541	1	0.51899	potential coding
as72	131,771	132,362	92	0.37919	10.59503174	1	0.1744	noncoding
as14	20,396	20,968	61	0.42294	11.4664917	-1	0.166751	noncoding
as18	34,959	35,525	66	0.38964	9.09979248	1	0.0612489	noncoding
as14	23,857	24,419	122	0.41761	7.848937988	1	0.676495	potential coding
as18	34,959	35,409	66	0.38397	9.09979248	1	0.0575741	noncoding
as72	132,040	132,362	92	0.40522	10.59503174	1	0.245726	noncoding
as70	127,858	128,110	63	0.48248	9.731506348	-1	0.0865833	noncoding
as70	127,858	128,030	41	0.45432	9.862609863	-1	0.074044	noncoding
as24	58,078	63,941	145	0.37609	11.45904541	1	0.552389	potential coding
as35	66,315	67,175	77	0.45793	11.65533447	1	0.295222	noncoding
as19	42,724	43,519	79	0.45412	4.895812988	1	0.347874	noncoding
as9	14,922	15,699	55	0.32795	10.12921143	1	0.0285667	noncoding
as14	23,686	24,419	166	0.45402	7.733215332	1	0.982723	potential coding
