# Supplementary material for: Hybrid Sequencing Reveals Novel Features in the Transcriptomic Organization of Equid Alphaherpesvirus 1
Source: Preprints.org preprint supplement (doi:10.20944/preprints202206.0219.v1), 2022-06-15
Supplement: Supplementary file 4 [file Supplementary Table S4.docx]

| 2 min | 98°C |  |
| --- | --- | --- |
| 30 sec | 98°C | 15 cycles |
| 30 sec | 65°C |
| 60 sec | 72°C |
| 4 min | 72°C |  |
