# Supplementary material for: Hybrid Sequencing Reveals Novel Features in the Transcriptomic Organization of Equid Alphaherpesvirus 1
Source: Preprints.org preprint supplement (doi:10.20944/preprints202206.0219.v1), 2022-06-15
Supplement: Supplementary file 5 [file Supplementary Table S5.docx]

**Supplementary Table S5. Barcodes**

| **Sample** | **Barcode** | **Barcode sequence** | **Flow cell** |
| --- | --- | --- | --- |
| Poly(A)+ | A6(BC06) |  | #1 |
| Poly(A)+ & Terminator-treated | A12(BC12) |  | #1 |
| Poly(A)+ 1h/A | B1(BC13) |  | #2 |
| Poly(A)+ 1h/B | B2(BC14) |  | #2 |
| Poly(A)+ 1h/C | B3(BC15) |  | #2 |
| Poly(A)+ 2h/A | B4(BC16) |  | #2 |
| Poly(A)+ 2h/B | B5(BC17) |  | #2 |
| Poly(A)+ 2h/C | B6(BC18) |  | #2 |
| Poly(A)+ 4h/A | B7(BC19) |  | #3 |
| Poly(A)+ 4h/B | B8(BC20) |  | #3 |
| Poly(A)+ 4h/C | B9(BC21) |  | #3 |
| Poly(A)+ 6h/A | B10(BC22) |  | #3 |
| Poly(A)+ 6h/B | B11(BC23) |  | #3 |
| Poly(A)+ 6h/C | B12(BC24) |  | #3 |
| Poly(A)+ 8h/A | A7(BC07) |  | #4 |
| Poly(A)+ 8h/B | A8(BC08) |  | #4 |
| Poly(A)+ 8h/C | A9(BC09) |  | #4 |
| Poly(A)+ 12h/A | A10(BC10) |  | #4 |
| Poly(A)+ 12h/B | A11(BC11) |  | #4 |
| Poly(A)+ 12h/C | A12(BC12) |  | #4 |
| Poly(A)+ 18h/A | B7(BC19) |  | #5 |
| Poly(A)+ 18h/B | B8(BC20) |  | #5 |
| Poly(A)+ 18h/C | B9(BC21) |  | #5 |
| Poly(A)+ 24h/A | B10(BC22) |  | #5 |
| Poly(A)+ 24h/B | B11(BC23) |  | #5 |
| Poly(A)+ 24h/C | B12(BC24) |  | #5 |
| Poly(A)+ 48h/A | B4(BC16) |  | #5 |
| Poly(A)+ 48h/B | B5(BC17) |  | #5 |
| Poly(A)+ 48h/C | B6(BC18) |  | #5 |
