# Supplementary material for: Hybrid Sequencing Reveals Novel Features in the Transcriptomic Organization of Equid Alphaherpesvirus 1
Source: Preprints.org preprint supplement (doi:10.20944/preprints202206.0219.v1), 2022-06-15
Supplement: Supplementary file 6 [file Supplementary Table S6.docx]

**Supplementary Table S6. RNA concentrations**

| **Sample** | **Concentration (ng/µl)** |
| --- | --- |
| Poly(A)+ | 0.8 |
| Poly(A)+ & Terminator-treated | 1.52 |
| Poly(A)+ 1h/A | 1.64 |
| Poly(A)+ 1h/B | 1.36 |
| Poly(A)+ 1h/C | 1.69 |
| Poly(A)+ 2h/A | 1.21 |
| Poly(A)+ 2h/B | 1.19 |
| Poly(A)+ 2h/C | 1.18 |
| Poly(A)+ 4h/A | 1.22 |
| Poly(A)+ 4h/B | 1.30 |
| Poly(A)+ 4h/C | 1.43 |
| Poly(A)+ 6h/A | 1.77 |
| Poly(A)+ 6h/B | 1.70 |
| Poly(A)+ 6h/C | 1.61 |
| Poly(A)+ 8h/A | 0.66 |
| Poly(A)+ 8h/B | 0.76 |
| Poly(A)+ 8h/C | 1.06 |
| Poly(A)+ 12h/A | 1.14 |
| Poly(A)+ 12h/B | 0.85 |
| Poly(A)+ 12h/C | 1.00 |
| Poly(A)+ 18h/A | 1.63 |
| Poly(A)+ 18h/B | 1.45 |
| Poly(A)+ 18h/C | 1.43 |
| Poly(A)+ 24h/A | 0.85 |
| Poly(A)+ 24h/B | 0.93 |
| Poly(A)+ 24h/C | 0.52 |
| Poly(A)+ 48h/A | 0.64 |
| Poly(A)+ 48h/B | 0.76 |
| Poly(A)+ 48h/C | 1.25 |
