# Supplementary material for: Hybrid Sequencing Reveals Novel Features in the Transcriptomic Organization of Equid Alphaherpesvirus 1
Source: Preprints.org preprint supplement (doi:10.20944/preprints202206.0219.v1), 2022-06-15
Supplement: Supplementary file 7 [file Supplementary Table S7.docx]

**Supplementary Table S7. Nucleic acid concentrations of library samples**

| **Sample** | **Concentration (**ng/µl**)** |
| --- | --- |
| dRNA library – untreated | 3.10 |
| dRNA library – Terminator-treated | 2.08 |
